# Supplementary material for: Impact of imine bond orientations on photocatalytic hydrogen generation of benzothiadiazole-based covalent organic frameworks constructed using “two-in-one” monomers
Source: Royal Society of Chemistry journal article supplement (doi:10.1039/d4tc02995j), 2024-01-01
Supplement: d4tc02995j1.pdf [file d4tc02995j1.pdf]

## *Supporting Information*

### **Impact of Imine Bond Orientations on Photocatalytic Hydrogen Generation of Benzothiadiazole-based Covalent Organic Frameworks Constructed using “Two-in-One” Monomers**

Ze-Yang Wang,<sup>†</sup> Jia-Xin Guo,<sup>†</sup> Shuai Sun,<sup>†</sup> Chao-Qin Han,<sup>\*,†</sup> Xiao-Yuan Liu<sup>\*,†</sup>

<sup>†</sup> Hoffmann Institute of Advanced Materials, Shenzhen Polytechnic University, 7098 Liuxian Blvd, Nanshan District, Shenzhen, 518055, P. R. China

## Chemicals

3,5-dibromobenzaldehyde, neopentyl glycol, *p*-toluenesulfonic acid, 4-(4,4,5,5-tetramethyl-1,3,2-dioxaborolan-2-yl)aniline, 4-(4,4,5,5-tetramethyl-1,3,2-dioxaborolan-2-yl)benzaldehyde, 3,5-dibromoaniline and 4,7-bis(4,4,5,5-tetramethyl-1,3,2-dioxaborolan-2-yl)benzo[*c*][1,2,5]thiadiazole were purchased from Shanghai Aladdin Biochemical Technology Co., Ltd. All the other chemicals were obtained from the chemical supplies and used without further purification.

## Characterization

Nuclear magnetic resonance (NMR) data were collected using 400 MHz JEOL JNM-ECZ400S. Powder X-ray diffraction (PXRD) patterns were recorded using Bruker D8 Advance X-ray diffractometer with Cu K $\alpha$  radiation. The photoluminescent and UV-vis absorption spectra were recorded on FLS1000 spectrofluorometer (Edinburgh Instruments) and Shimadzu UV-3600 spectrophotometer, respectively. Fourier transform infrared (FT-IR) spectra were recorded using a PerkinElmer spectrometer. The TGA data were obtained using TGA 550 (TA Instruments) analyzer and the samples were heated from room temperature to 800°C at a ramp rate of 10°C / min. Scanning electron micrographs (SEM) and Transmission electron microscope (TEM) images were taken using a JEOL JSM-IT800 (SHL) and Thermo Scientific Talos F200S, respectively. Gas chromatographic (GC) analysis was carried out on a CEAULIGHT GC-7920 instrument equipped with a thermal conductivity detector (TCD) using high pure nitrogen as the carrier gas.

## Photoelectrochemical measurements

All the photoelectrochemical measurement were obtained on an electrochemical workstation

(CHI660E, CH Instrument Corp, Shanghai). 5 mg of HIAM-0026/HIAM-0026 $\nu$  was added to a mixed solution of 1 mL ethanol and 10  $\mu$ L 5 wt% Nafion. The mixture was then ultrasonicated for two hours to get homogeneous suspension. The suspension was dropped on the surface of ITO glass and dried at room temperature. A standard three electrode system was used with the photocatalyst-coated ITO glass as the working electrode, Pt wire as the counter electrode and an Ag/AgCl as a reference electrode. 0.1 M Na<sub>2</sub>SO<sub>4</sub> aqueous solution was used as the electrolyte. Mott-Schottky measurement was carried out at frequency of 1000, 1500 and 2000 Hz with amplitude of 5 mV.

### **Stability testing of COFs**

Samples of HIAM-0026/HIAM-0026 $\nu$  (~ 5 mg) was suspended in 1 mL HCl solution (pH = 2, pH = 4), NaOH solution (pH = 10, pH = 12), water, or boiling water. These suspensions were sealed in 5 mL glass vials and stored at room temperature or 100 °C for 24 hours. The samples were then washed with ethanol and dried under 100 °C vacuum. The resultant COFs were used for PXRD and IR analysis.

### **Photocatalytic hydrogen evolution**

3 mg HIAM-0026/HIAM-0026 $\nu$  was well dispersed in 50 mL deionized water containing 0.1 M ascorbic acid (AA) as the sacrificial agent. Then 0.018 M chloroplatinic acid (H<sub>2</sub>PtCl<sub>6</sub>) aqueous solution (3 wt% Pt) was introduced into the reaction system. The reaction solution was evacuated under vacuum to completely discharge air. After that the reaction system was irradiated vertically under 300 W xenon lamp with  $\lambda > 420$  nm cut-off filter.

Apparent quantum efficiency (AQY) measurements were performed under monochromatic irradiation generated from a 300 W Xe lamp equipped with bandpass filters (central

wavelength: 450, 500 and 550 nm; full width at half maximum: 10 nm). Monochromatic photon fluxes at each wavelength were measured using an optical photodiode power meter (CEL-NP2000 Intense Light Power Meter). The corresponding intensities were 4.614, 9.536 and 5.906 mW cm<sup>-2</sup>, respectively. The AQY was calculated using the following equation:

$$\eta_{AQY} = \frac{N_e}{N_p} \times 100\% = \frac{2 \times M \times N_A \times h \times c}{S \times P \times t \times \lambda} \times 100\%$$

Where,  $N_e$  is the amount of generated electrons,  $N_p$  is the incident photons,  $M$  is the amount of H<sub>2</sub> molecules (mol),  $N_A$  is Avogadro constant ( $6.022 \times 10^{23}$  mol<sup>-1</sup>),  $h$  is the Planck constant ( $6.626 \times 10^{-34}$  J·s),  $c$  is the speed of light ( $3 \times 10^8$  m·s<sup>-1</sup>),  $S$  is the irradiation area (cm<sup>2</sup>),  $P$  is the intensity of irradiation light (W·cm<sup>-2</sup>),  $t$  is the photoreaction time (s),  $\lambda$  is the wavelength of the monochromatic light (m).

### Synthesis of 2-(3,5-dibromophenyl)-5,5-dimethyl-1,3-dioxane

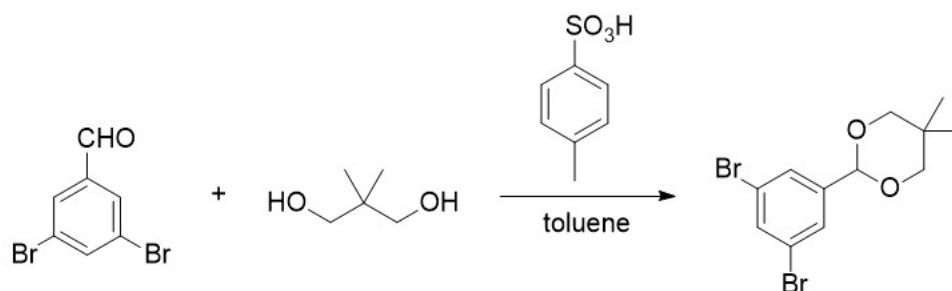

3,5-dibromobenzaldehyde (10.56 g, 40.00 mmol), neopentyl glycol (12.50 g, 120.00 mmol) and *p*-toluenesulfonic acid (0.68 g, 4.00 mmol) were added to a 500 mL of two-neck round-bottom flask. The reaction mixture was firstly deoxygenized with nitrogen for three times, and then 300 mL of toluene was added. The reaction mixture was heated 150 °C overnight under nitrogen. After cooling down to room temperature, the organic solvent was removed under reduced pressure to offer 2-(3,5-dibromophenyl)-5,5-dimethyl-1,3-dioxane as a white solid (14.00 g, yield: 99.0 %). <sup>1</sup>H NMR (400 MHz, CDCl<sub>3</sub>) δ (ppm): 7.61 (1H), 7.56 (2H), 5.29 (1H), 3.73 (2H), 3.61(2H), 1.23 (3H), 0.77 (3H).

### Synthesis of 3'-bromo-5'-(5,5-dimethyl-1,3-dioxan-2-yl)-[1,1'-biphenyl]-4-amine

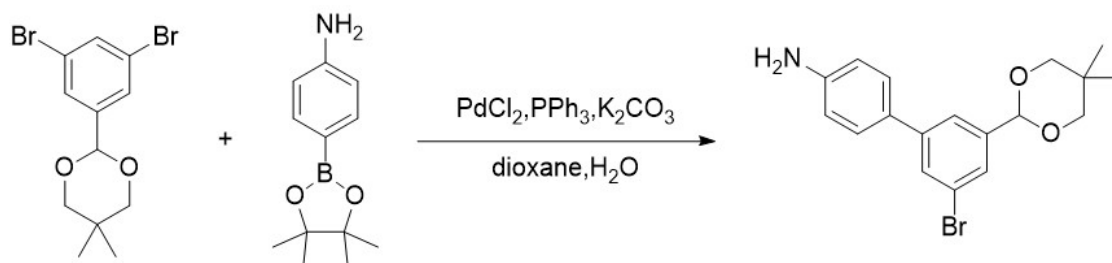

2-(3,5-dibromophenyl)-5,5-dimethyl-1,3-dioxane (40.00 mmol, 14.00 g), 4-(4,4,5,5-tetramethyl-1,3,2-dioxaborolan-2-yl)aniline (20.00 mmol, 4.38 g), PdCl<sub>2</sub> (1.00 mmol, 0.17 g),

PPh<sub>3</sub> (2.00 mmol, 0.52 g) and K<sub>2</sub>CO<sub>3</sub> (40.00 mmol, 5.53 g) were added into one 500 mL flask containing 160 mL dioxane and 40 mL water. The mixture was degassed four times and stirred at 110 °C overnight under nitrogen. After cooling down to room temperature, the organic solvent was removed under reduced pressure. The crude product was purified by Al<sub>2</sub>O<sub>3</sub> column chromatography to offer 3'-bromo-5'-(5,5-dimethyl-1,3-dioxan-2-yl)-[1,1'-biphenyl]-4-amine as a yellow solid (3.78 g, yield: 52.1 %). <sup>1</sup>H NMR (400 MHz, CDCl<sub>3</sub>) δ (ppm): 7.63 (1H), 7.56 (2H), 7.38 (1H), 7.36 (1H), 6.71 (2H), 5.37(1H), 3.78 (2H), 3.64 (2H), 1.28 (3H), 0.79 (3H).

**Synthesis of 5',5'''-(benzo[*c*][1,2,5]thiadiazole-4,7-diyl)bis(3'-(5,5-dimethyl-1,3-dioxan-2-yl)-[1,1'-biphenyl]-4-amine) (BTBBA)**

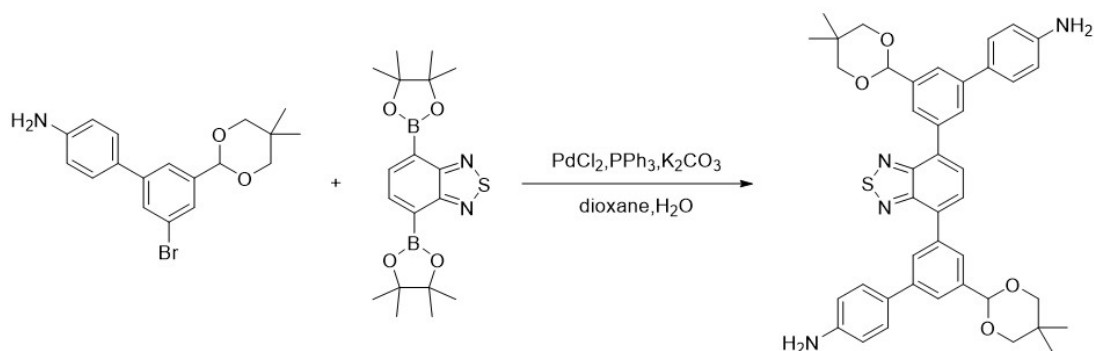

3'-bromo-5'-(5,5-dimethyl-1,3-dioxan-2-yl)-[1,1'-biphenyl]-4-amine (10.43 mmol, 3.78 g), 4,7-bis(4,4,5,5-tetramethyl-1,3,2-dioxaborolan-2-yl)benzo[*c*][1,2,5]thiadiazole (3.48 mmol, 1.35 g), PdCl<sub>2</sub> (0.34 mmol, 0.06 g), PPh<sub>3</sub> (0.69 mmol, 0.18 g) and K<sub>2</sub>CO<sub>3</sub> (10.43 mmol, 1.44 g) were added into one 250 mL flask containing 80mL dioxane and 20 mL water. The mixture was degassed four times and stirred at 110 °C overnight under nitrogen. After cooling down to room temperature, the organic solvent was removed under reduced pressure. The crude product was

purified by Al<sub>2</sub>O<sub>3</sub> column chromatography to offer 5',5''-(benzo[c][1,2,5]thiadiazole-4,7-diyl)bis(3'-(5,5-dimethyl-1,3-dioxan-2-yl)-[1,1'-biphenyl]-4-amine) as an orange color solid (2.00 g, yield: 82.2 %). <sup>1</sup>H NMR (400 MHz, CDCl<sub>3</sub>) δ (ppm): 8.19 (2H), 8.03 (2H), 7.89 (2H), 7.82 (2H), 7.58(4H), 6.82 (4H), 5.61 (2H), 3.87 (4H), 3.77 (4H), 1.38 (6H), 0.88 (6H). <sup>13</sup>C NMR (100 MHz, CDCl<sub>3</sub>) δ (ppm):154.28, 146.12, 141.74, 139.41, 138.03,132.30, 132.20, 128.76, 128.64, 128.45, 125.16, 124.41, 115.53, 101.82, 75.18, 30.46, 25.00, 23.31, 22.09.

**Synthesis of 2-(4-(5,5-dimethyl-1,3-dioxan-2-yl)phenyl)-4,4,5,5-tetramethyl-1,3,2-dioxaborolane**

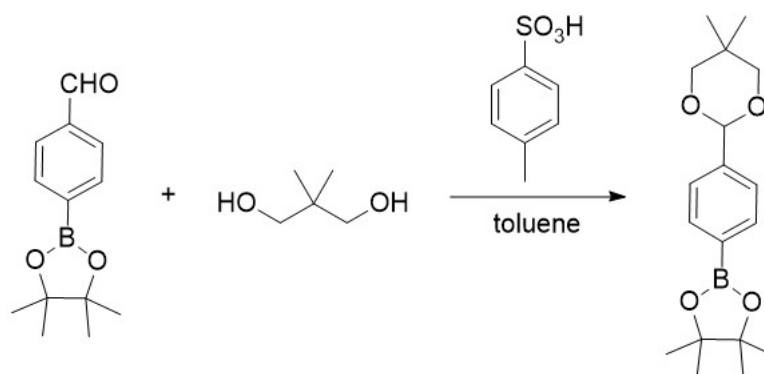

4-(4,4,5,5-tetramethyl-1,3,2-dioxaborolan-2-yl)benzaldehyde (4.64 g, 20 mmol), neopentyl glycol (6.25 g, 60.00 mmol) and *p*-toluenesulfonic acid (0.34 g, 2.00 mmol) were added to a 500 mL of two-neck round-bottom flask. The reaction mixture was firstly deoxygenized with nitrogen for three times, and then 300 mL of toluene was added. The reaction mixture was heated 150 °C overnight under nitrogen. After cooling down to room temperature, the organic solvent was removed under reduced pressure to offer 2-(4-(5,5-dimethyl-1,3-dioxan-2-yl)phenyl)-4,4,5,5-tetramethyl-1,3,2-dioxaborolane as a white solid (6.36 g, yield: 99.0 %). <sup>1</sup>H NMR (400 MHz, CDCl<sub>3</sub>) δ (ppm): 7.78 (2H), 7.46 (2H), 5.38 (1H), 3.75 (2H), 3.63(2H), 1.27 (3H), 0.99 (6H), 0.88 (6H), 0.78 (3H).

### Synthesis of 5-bromo-4'-(5,5-dimethyl-1,3-dioxan-2-yl)-[1,1'-biphenyl]-3-amine

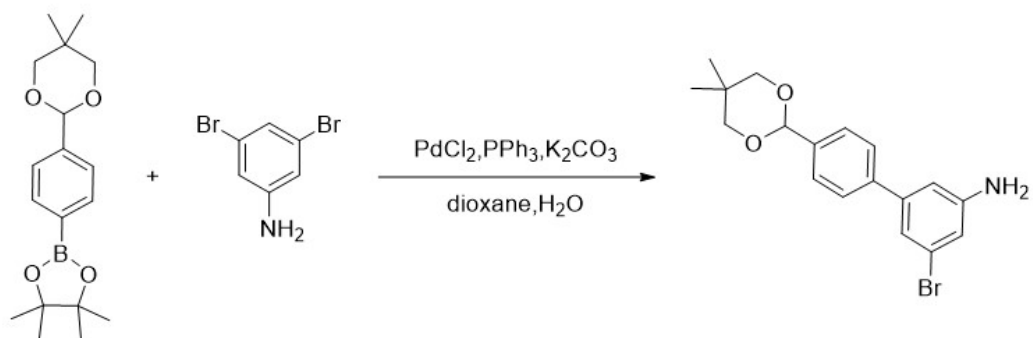

2-(4-(5,5-dimethyl-1,3-dioxan-2-yl)phenyl)-4,4,5,5-tetramethyl-1,3,2-dioxaborolane (25.00 mmol, 7.96 g), 3,5-dibromoaniline (100.00 mmol, 25.09 g), PdCl<sub>2</sub> (1.25 mmol, 0.22 g), PPh<sub>3</sub> (2.50 mmol, 0.65 g) and K<sub>2</sub>CO<sub>3</sub> (50.00 mmol, 6.91 g) were added into one 500 mL flask containing 200 mL dioxane and 50 mL water. The mixture was degassed four times and stirred at 110 °C overnight under nitrogen. After cooling down to room temperature, the organic solvent was removed under reduced pressure. The crude product was purified by Al<sub>2</sub>O<sub>3</sub> column chromatography to offer 3'-bromo-5'-(5,5-dimethyl-1,3-dioxan-2-yl)-[1,1'-biphenyl]-4-amine as a yellow solid (2.10 g, yield: 23.1 %). <sup>1</sup>H NMR (400 MHz, CDCl<sub>3</sub>) δ (ppm): 7.54 (2H), 7.50 (2H), 7.07 (1H), 7.80 (1H), 6.75(1H), 5.38 (1H), 3.78 (2H), 3.66 (2H), 1.29 (3H), 0.80 (3H).

**Synthesis of 5,5'-(benzo[c][1,2,5]thiadiazole-4,7-diyl)bis(4'-(5,5-dimethyl-1,3-dioxan-2-yl)-[1,1'-biphenyl]-3-amine) (BTBBA $\nu$ )**



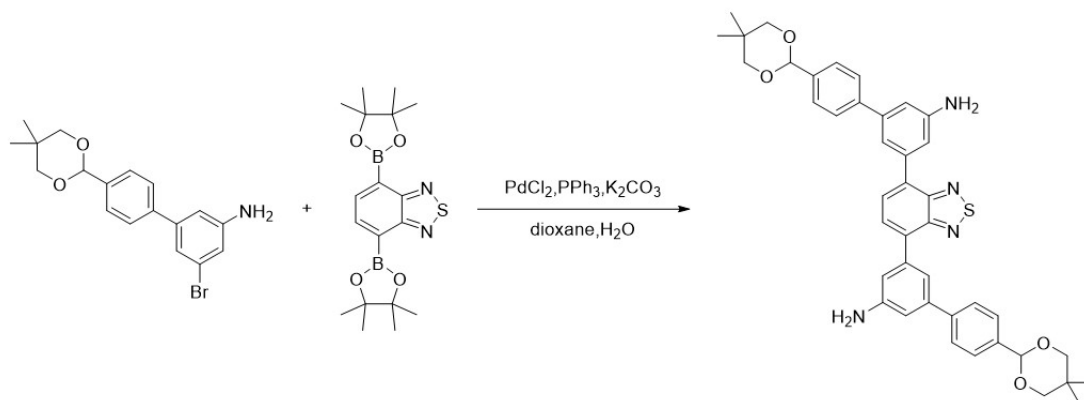

5-bromo-4'-(5,5-dimethyl-1,3-dioxan-2-yl)-[1,1'-biphenyl]-3-amine (12.70 mmol, 4.60 g), 4,7-bis(4,4,5,5-tetramethyl-1,3,2-dioxaborolan-2-yl)benzo[*c*][1,2,5]thiadiazole (8.47 mmol, 3.29 g), PdCl<sub>2</sub> (0.42 mmol, 0.07 g), PPh<sub>3</sub> (0.84 mmol, 0.22 g) and K<sub>2</sub>CO<sub>3</sub> (16.93 mmol, 2.34 g) were added into one 250 mL flask containing 80mL dioxane and 20 mL water. The mixture was degassed four times and stirred at 110 °C overnight under nitrogen. After cooling down to room temperature, the organic solvent was removed under reduced pressure. The crude product was purified by Al<sub>2</sub>O<sub>3</sub> column chromatography to offer 5,5''-(benzo[*c*][1,2,5]thiadiazole-4,7-diyl)bis(4'-(5,5-dimethyl-1,3-dioxan-2-yl)-[1,1'-biphenyl]-3-amine) as an orange color solid (1.80 g, yield: 30.43 %). <sup>1</sup>H NMR (400 MHz, CDCl<sub>3</sub>) δ (ppm): 7.76 (2H), 7.64 (4H), 7.56 (4H), 7.49 (2H), 7.26(2H), 6.96 (2H), 5.43 (2H), 3.78 (4H), 3.66 (4H), 1.30 (6H), 0.77 (6H). <sup>13</sup>C NMR (100 MHz, CDCl<sub>3</sub>) δ (ppm):154.16, 147.00, 142.54, 141.92, 139.01, 137.73, 133.52, 128.18, 127.32, 126.61, 119.03, 115.23, 114.14, 101.67, 75.11, 30.35, 24.93, 23.16, 22.00

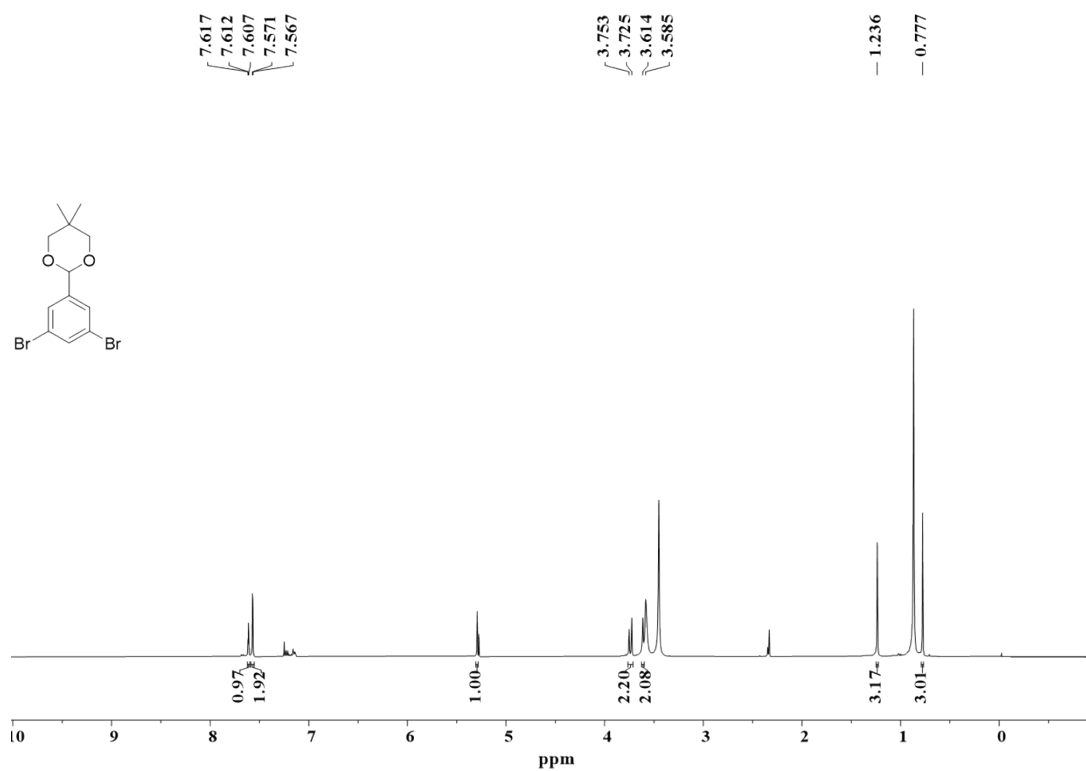

Figure S1. <sup>1</sup>H NMR spectrum of 2-(3,5-dibromophenyl)-5,5-dimethyl-1,3-dioxane.

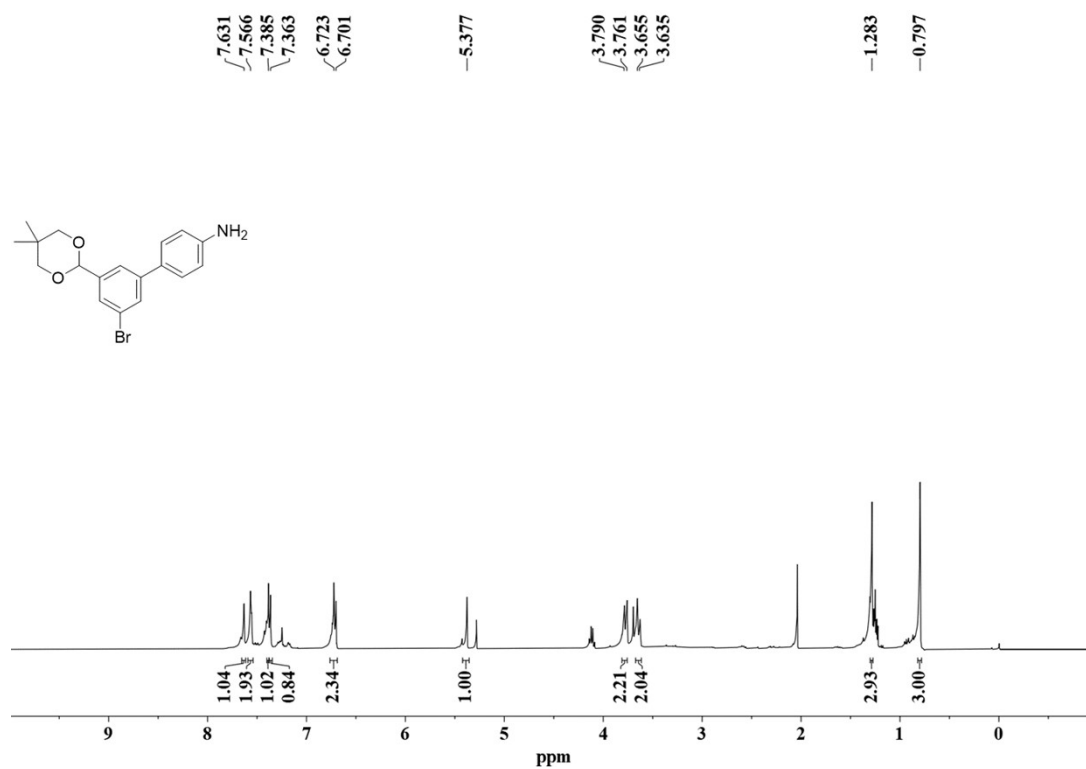

Figure S2. <sup>1</sup>H NMR spectrum of 3'-bromo-5'-(5,5-dimethyl-1,3-dioxan-2-yl)-[1,1'-biphenyl]-4-amine.

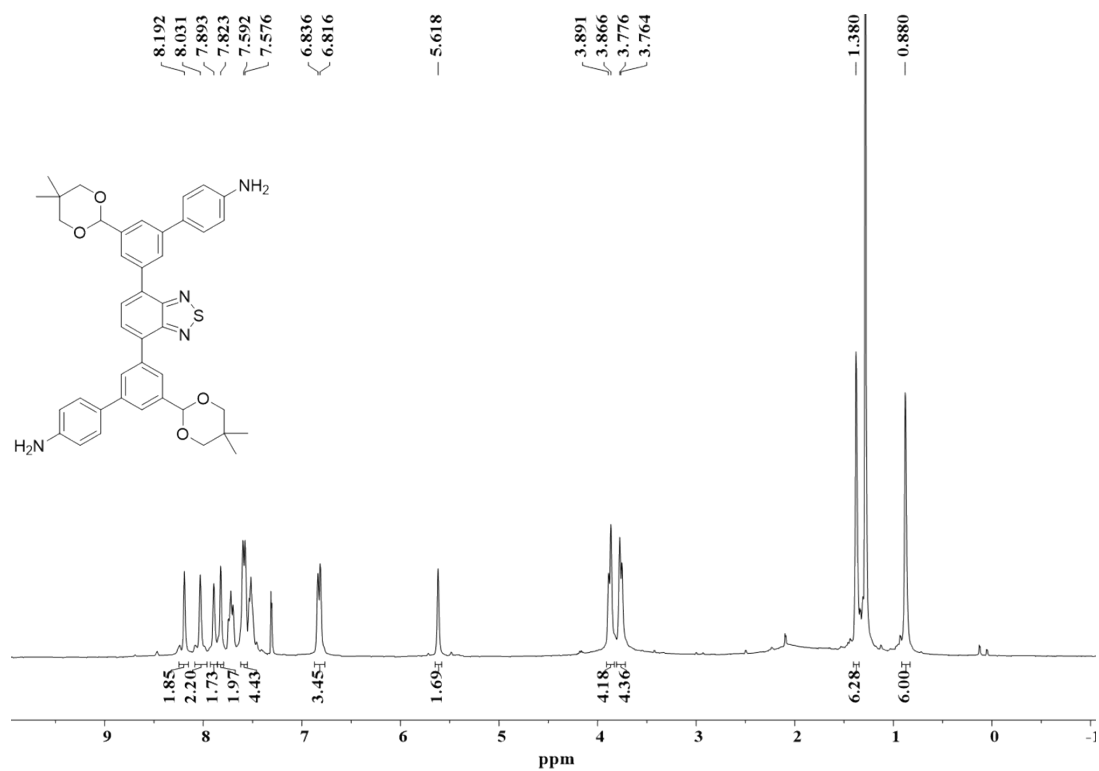

Figure S3. <sup>1</sup>H NMR spectrum of BTBBA.

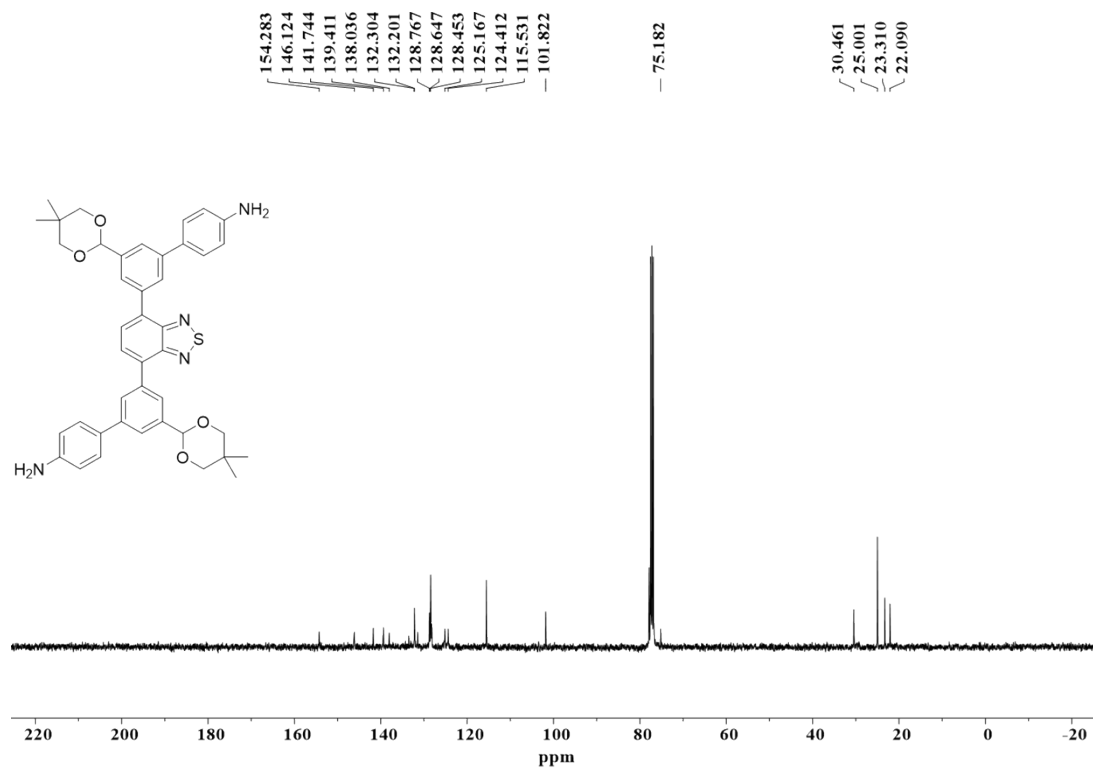

Figure S4. <sup>13</sup>C NMR spectrum of BTBBA.

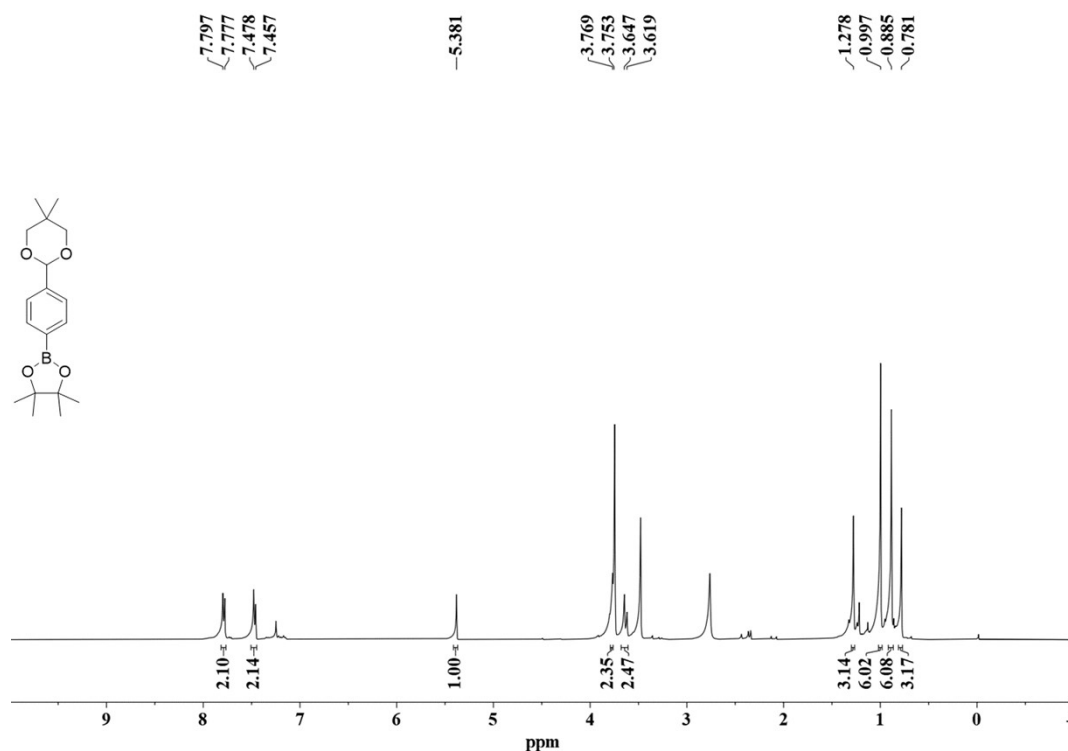

Figure S5. <sup>1</sup>H NMR spectrum of 2-(4-(5,5-dimethyl-1,3-dioxan-2-yl)phenyl)-4,4,5,5-tetramethyl-1,3,2-dioxaborolane.

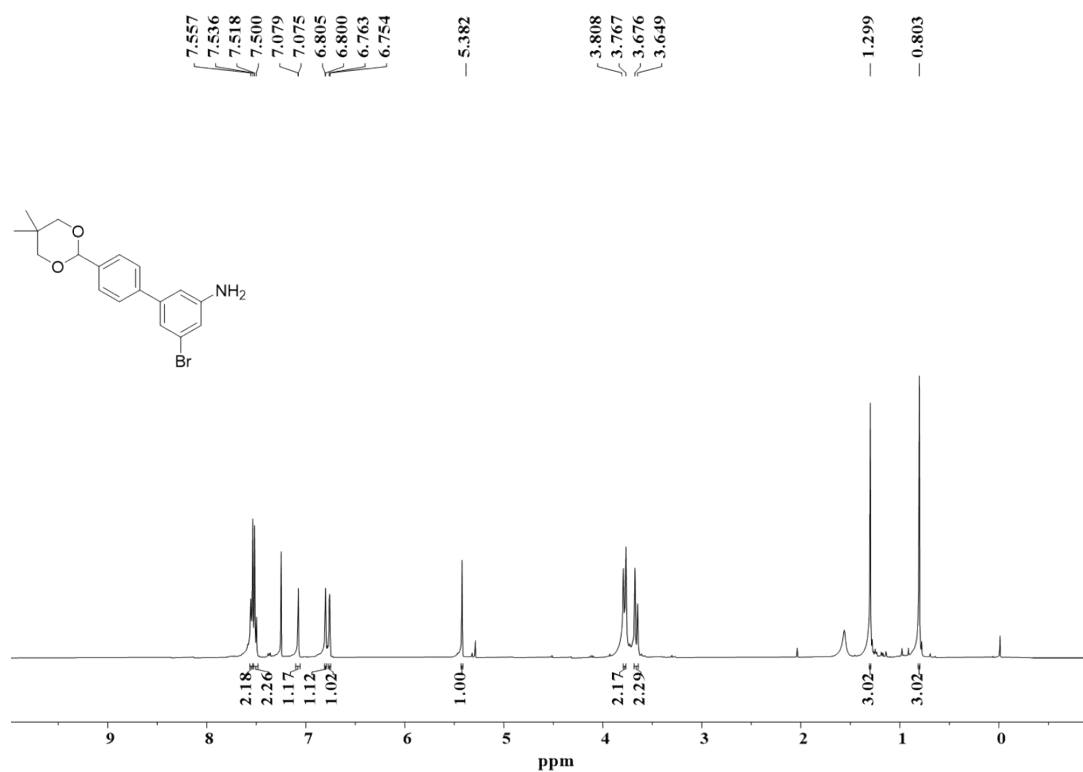

Figure S6. <sup>1</sup>H NMR spectrum of 5-bromo-4'-(5,5-dimethyl-1,3-dioxan-2-yl)-[1,1'-biphenyl]-3-amine.

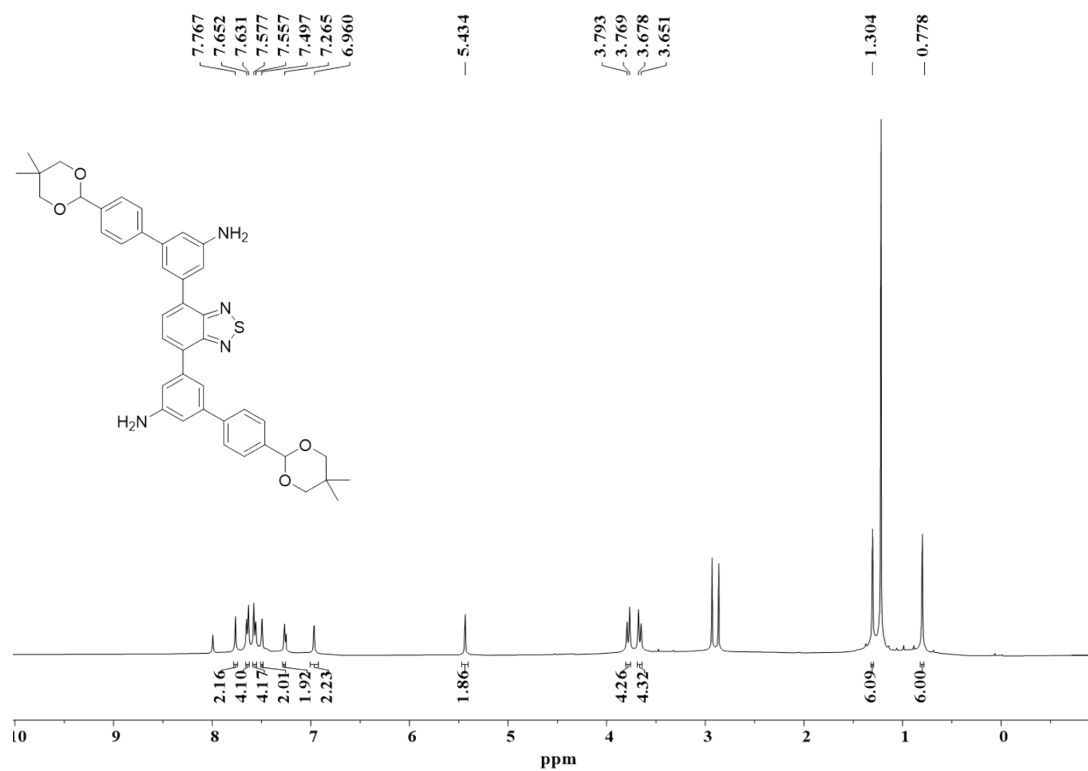

Figure S7. <sup>1</sup>H NMR spectrum of BTBBAv.

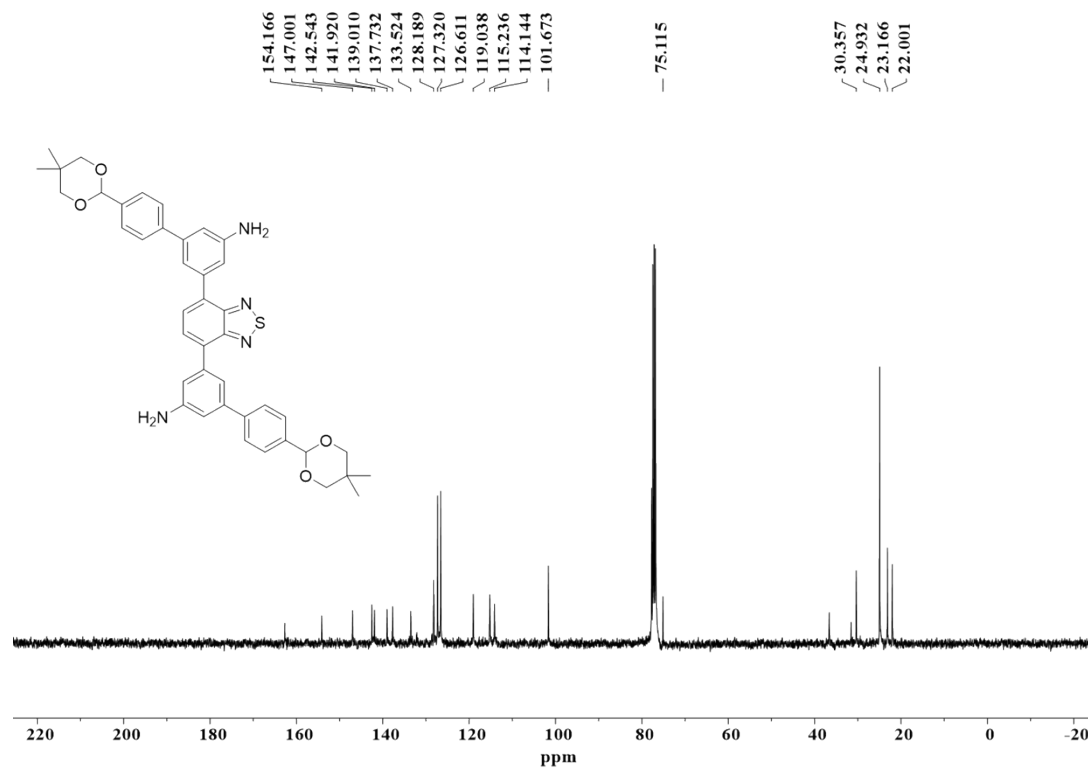

Figure S8. <sup>13</sup>C NMR spectrum of BTBBAv.

## Synthesis of HIAM-0026

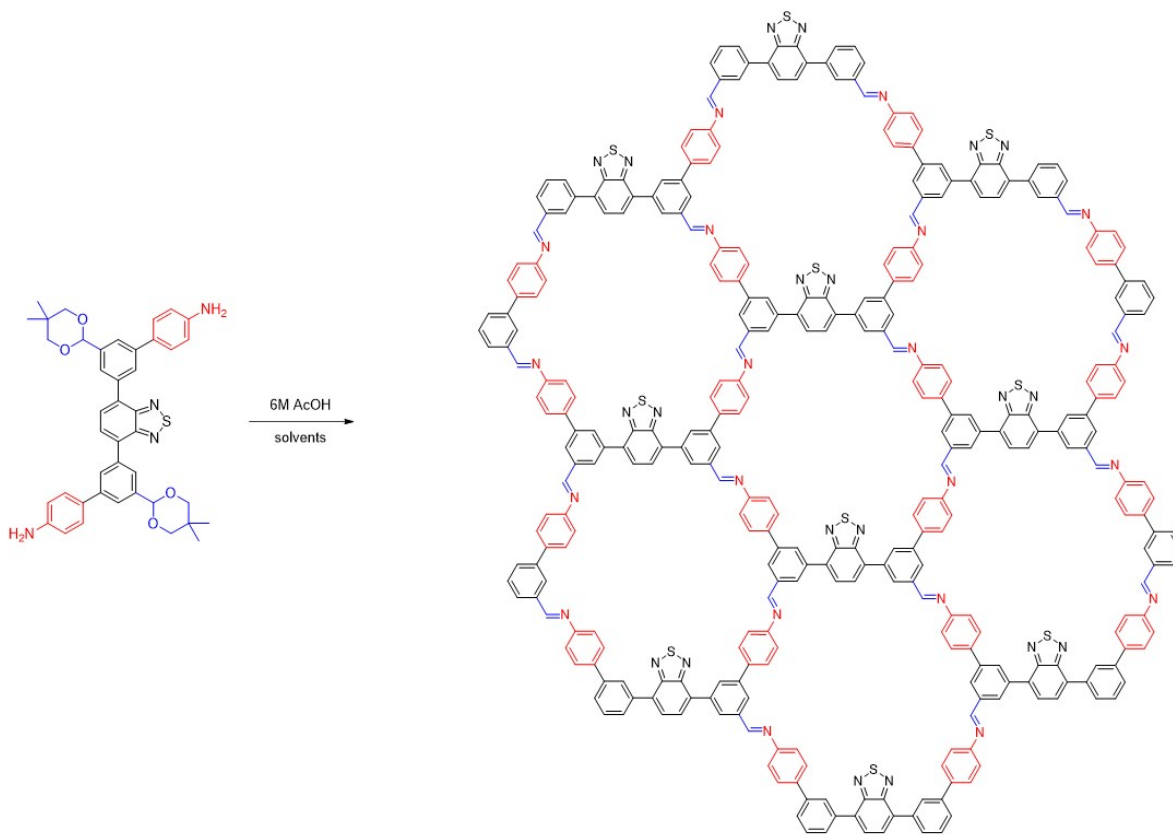

A Pyrex tube (10 mL) containing BTBBA (31.4 mg, 0.045 mmol) and *n*-butyl alcohol (*n*-BuOH, 1 mL) was sonicated for 3 min. Subsequently, 0.3 mL of acetic acid (6 M) was added. The tube was degassed through three freeze-pump-thaw cycles and then heated at 120 °C for 72 h. After cooling to room temperature, the precipitate was collected by filtration and washed with *N,N*-dimethylformamide (DMF) and ethanol (EtOH). The yellow solid was Soxhlet extracted in EtOH for 24 h and dried under 100 °C vacuum to afford HIAM-0026 (12.5 mg, yield: 56.6%).

## Synthesis of HIAM-0026v

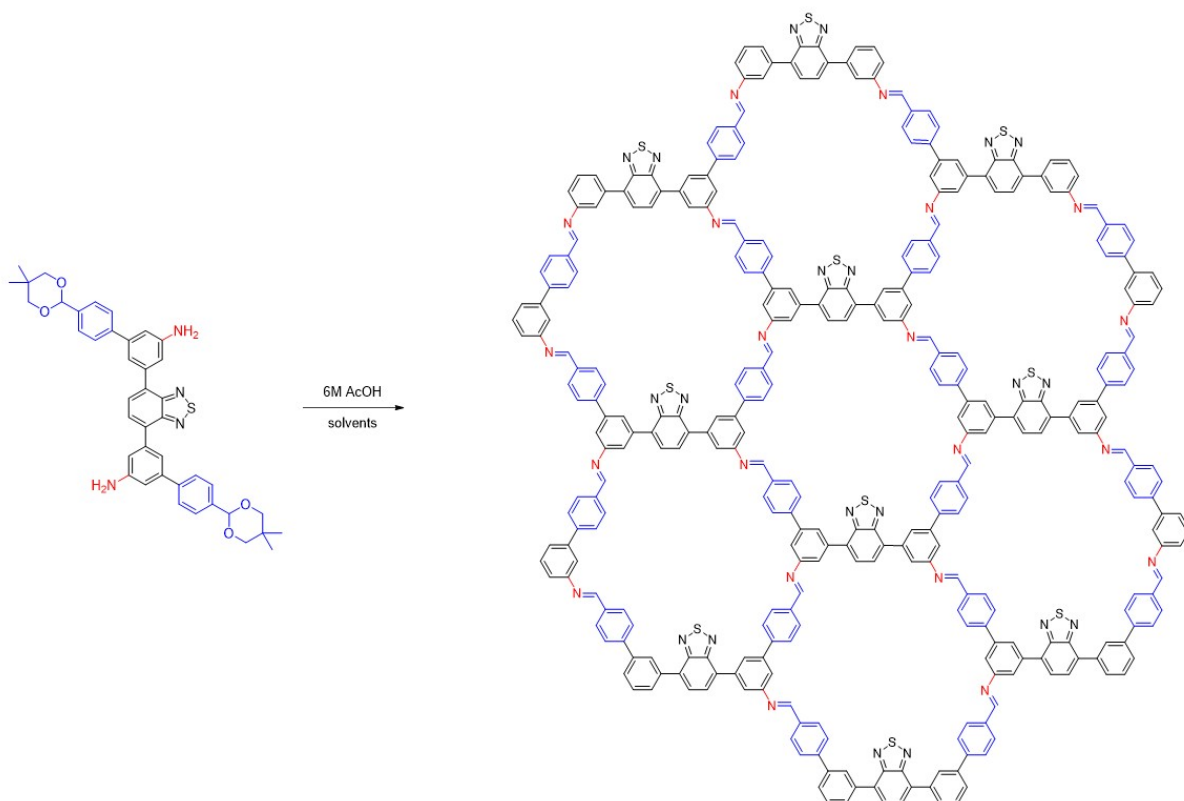

A Pyrex tube (10 mL) containing BTBBAv (31.4 mg, 0.045 mmol) and *n*-BuOH (1 mL) was sonicated for 3 min. Subsequently, 0.8 mL of acetic acid (6 M) was added. The tube was degassed through three freeze-pump-thaw cycles and then heated at 120 °C for 72 h. After cooling to room temperature, the precipitate was collected by filtration and washed with DMF and EtOH. The yellow solid was Soxhlet extracted in EtOH for 24 h and dried under 100 °C vacuum to afford HIAM-0026v (18.7 mg, yield: 85.0%).

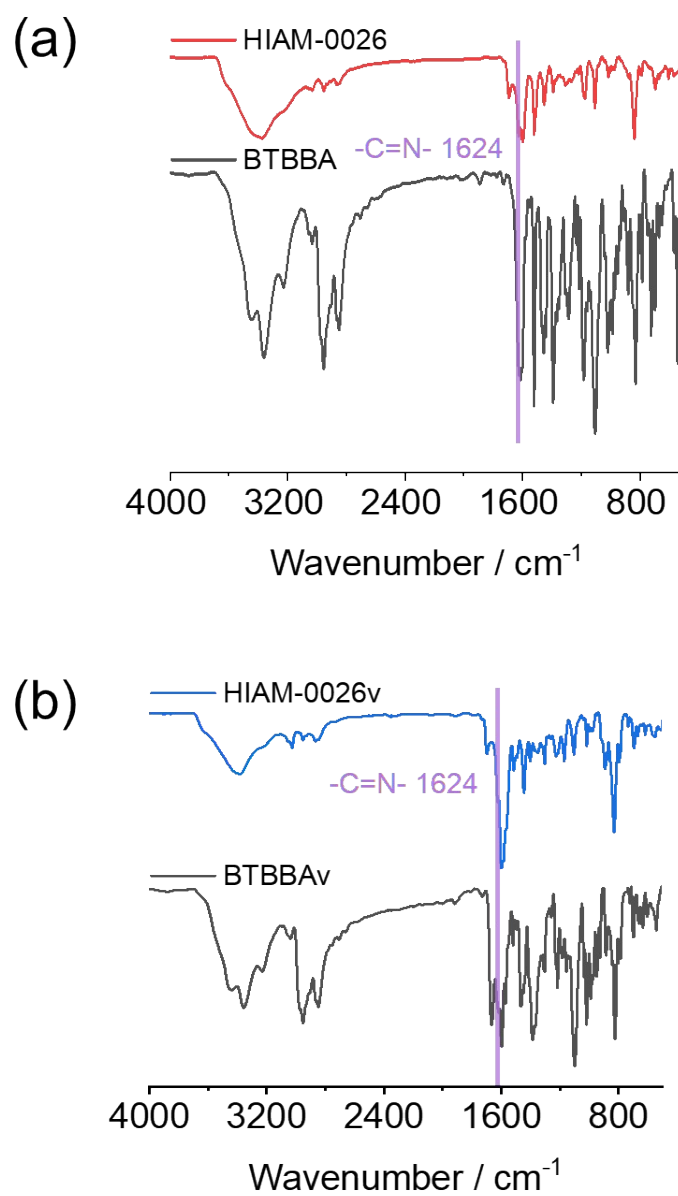

Figure S9. FT-IR spectra of HIAM-0026 (a) and HIAM-0026v (b) and the corresponding organic building units.



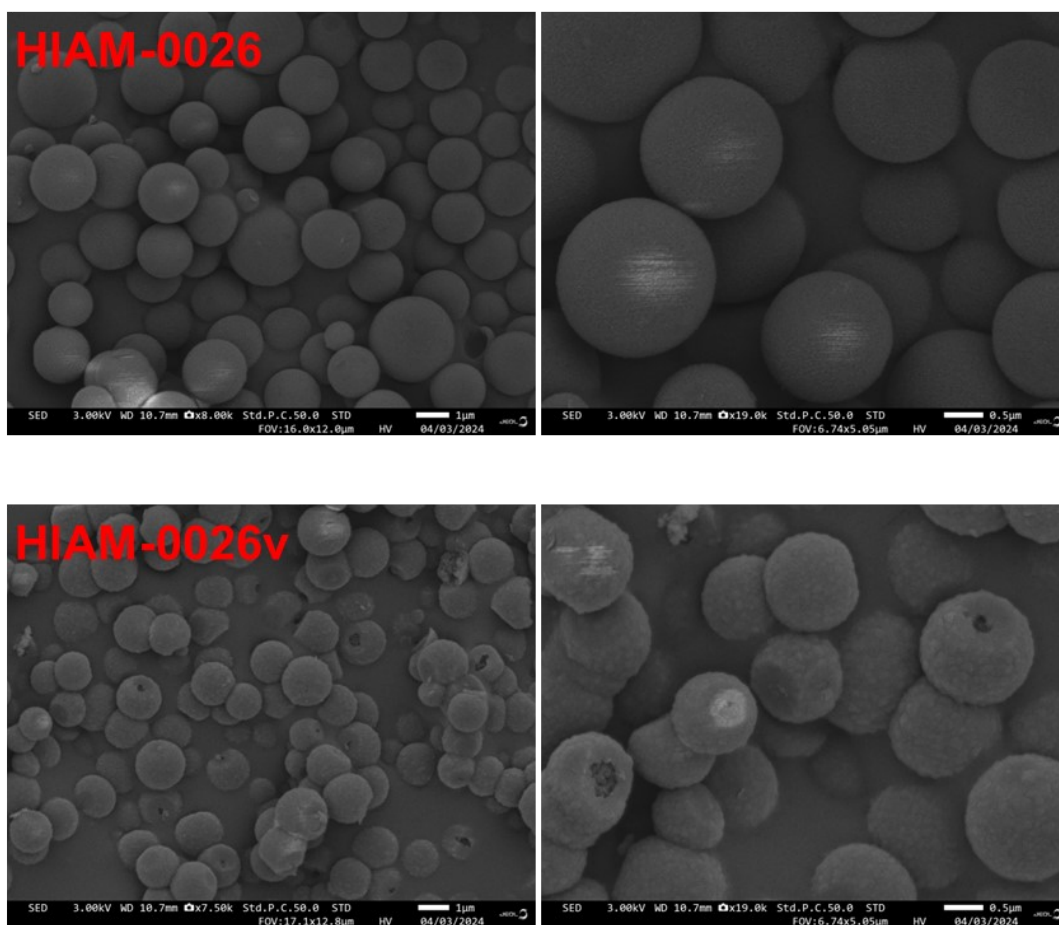

Figure S10. SEM images of HIAM-0026 and HIAM-0026v.

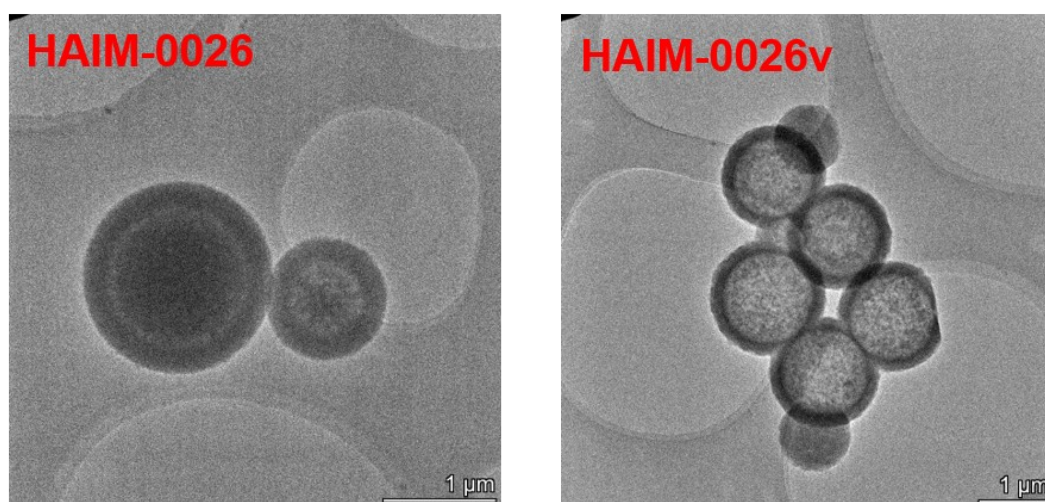

Figure S11. TEM images of HIAM-0026 and HIAM-0026v.

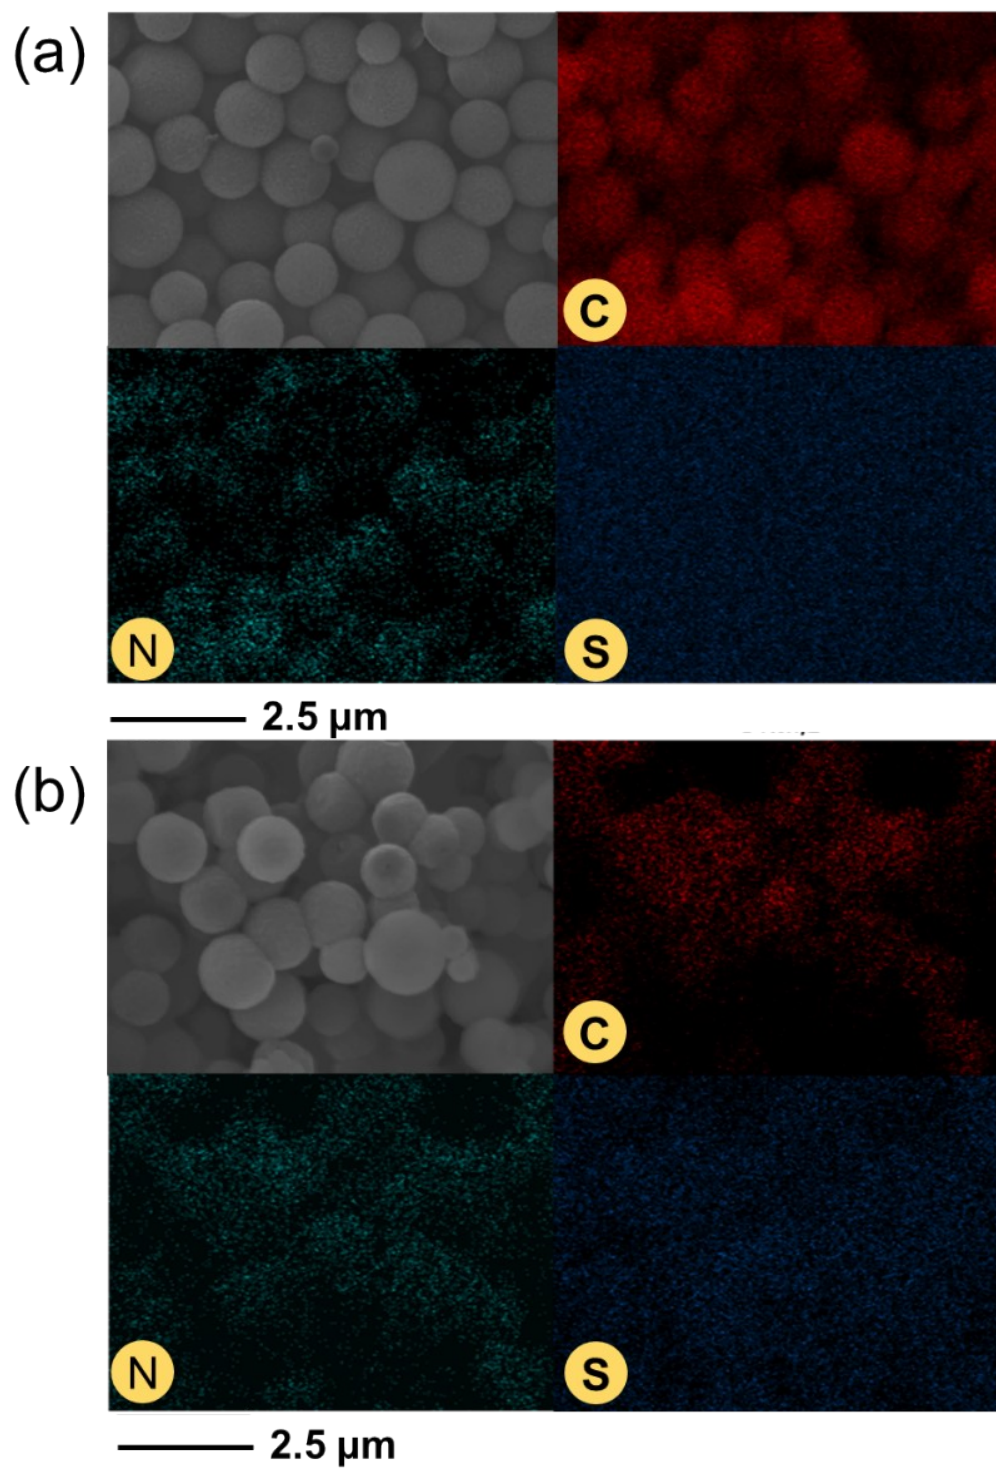

Figure S12. Energy dispersive X-ray analysis of HIAM-0026 (a) and HIAM-0026v (b).

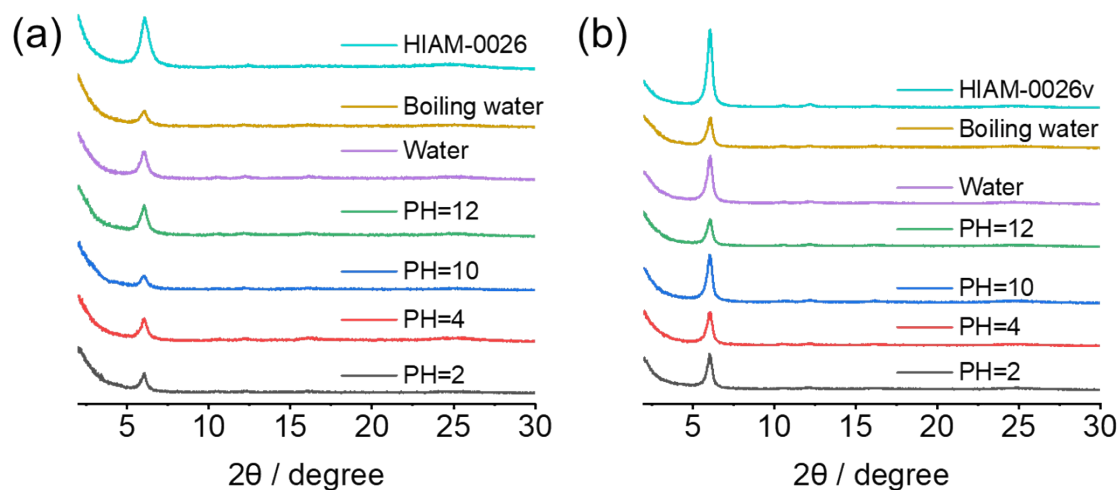

Figure S13. The PXRD patterns of HIAM-0026 (a) and HIAM-0026v after treatment under various conditions for 24 hours.

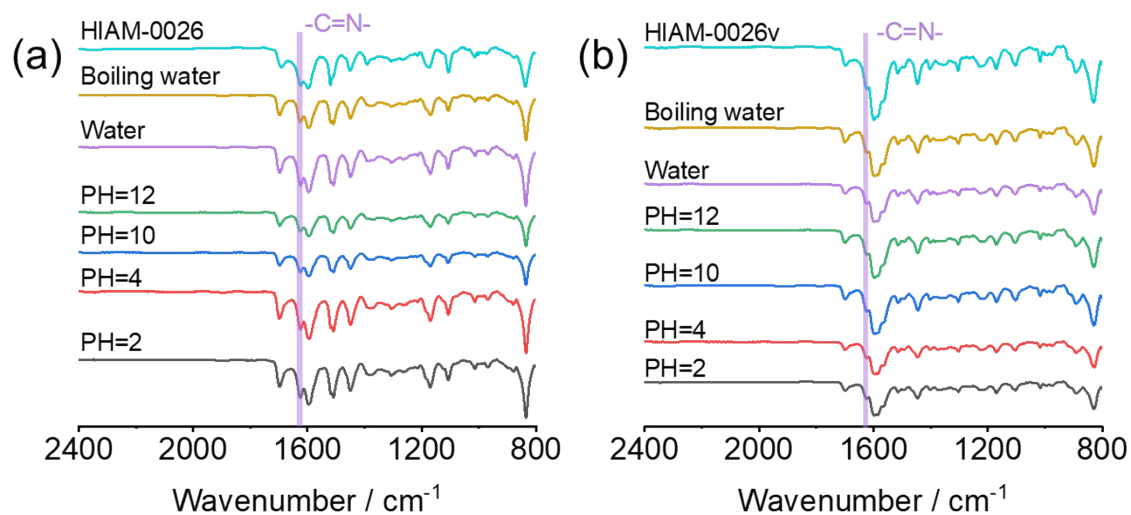

Figure S14. The FT-IR spectra of HIAM-0026 (a) and HIAM-0026v after treatment under various conditions for 24 hours.

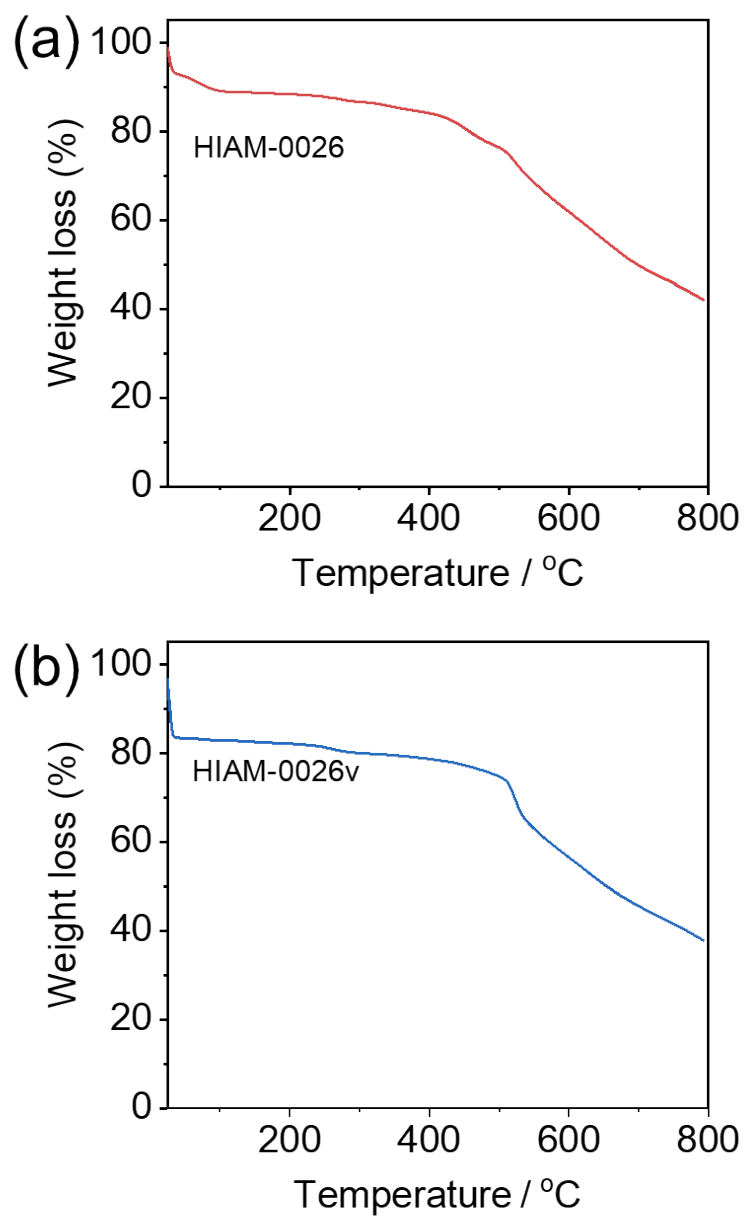

Figure S15. TGA curves of HIAM-0026 (a) and HIAM-0026v (b).

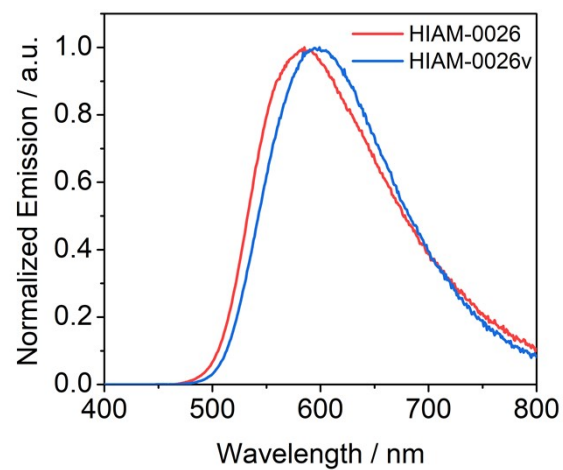

Figure S16. The photoluminescence spectra of HIAM-0026 and HIAM-0026v.



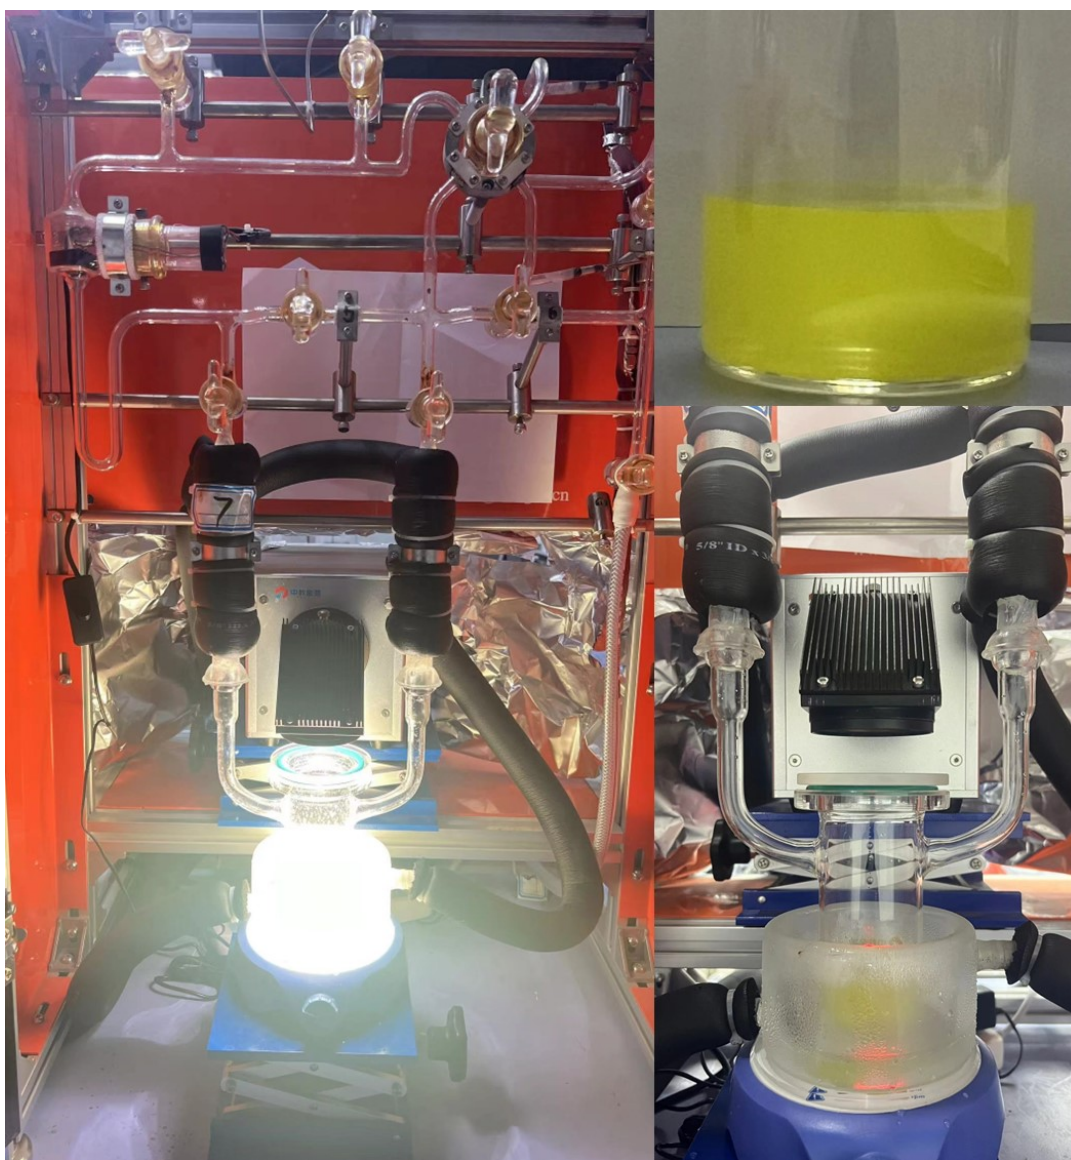

Figure S17. The images of the experimental setup used for the photocatalytic hydrogen generation.

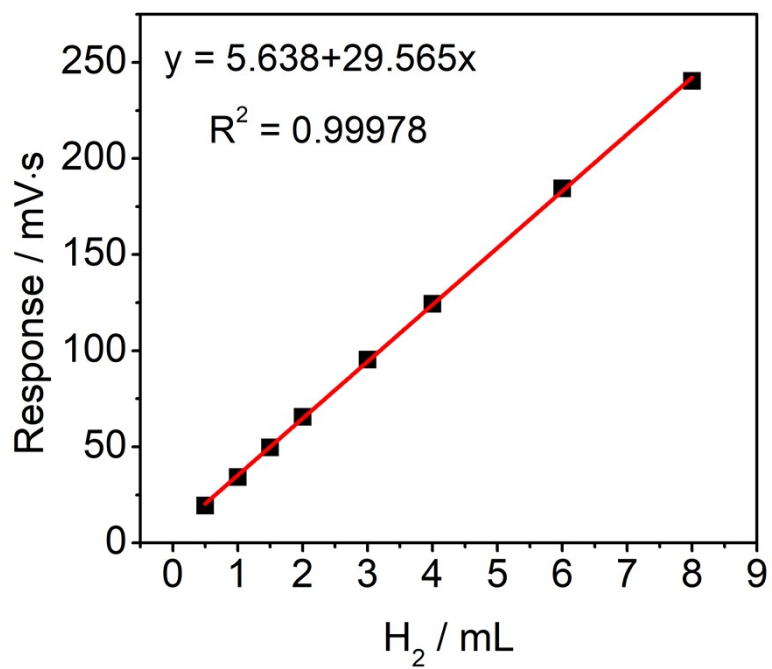

Figure S18. The calibration curve used for the quantification of hydrogen gas.

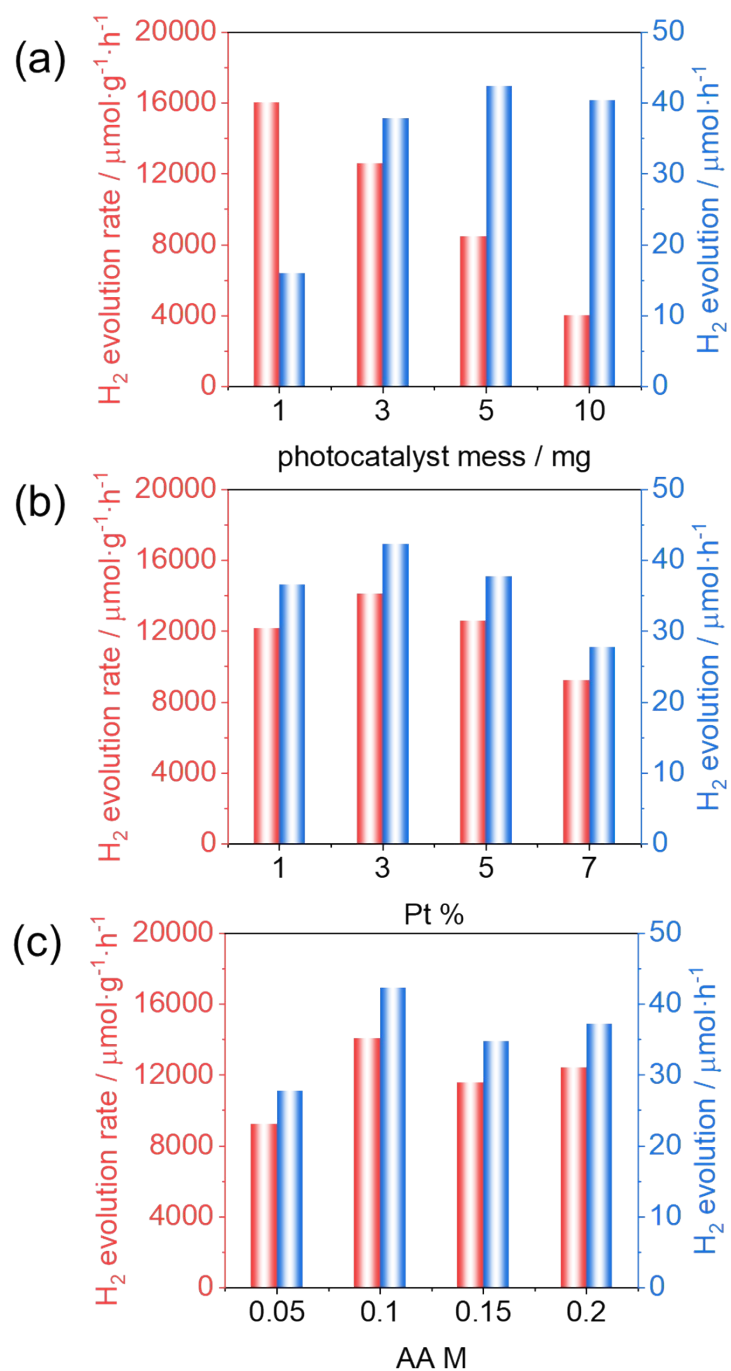

Figure S19. The photocatalyst mass (a), the amount of co-catalyst (b) and concentration of AA (c) effect on the photocatalytic hydrogen performance of HIAM-0026.



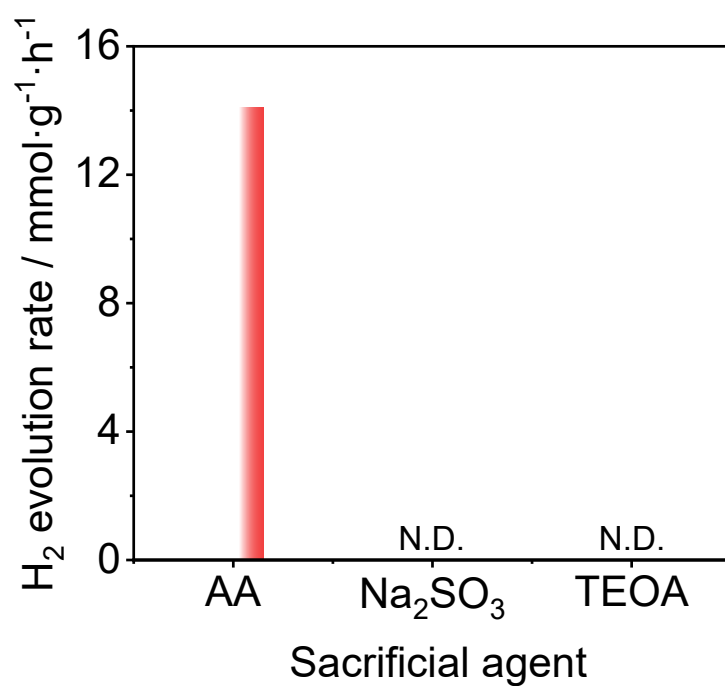

Figure S20. The photocatalytic hydrogen production performance of HIAM-0026 with various sacrificial donors.

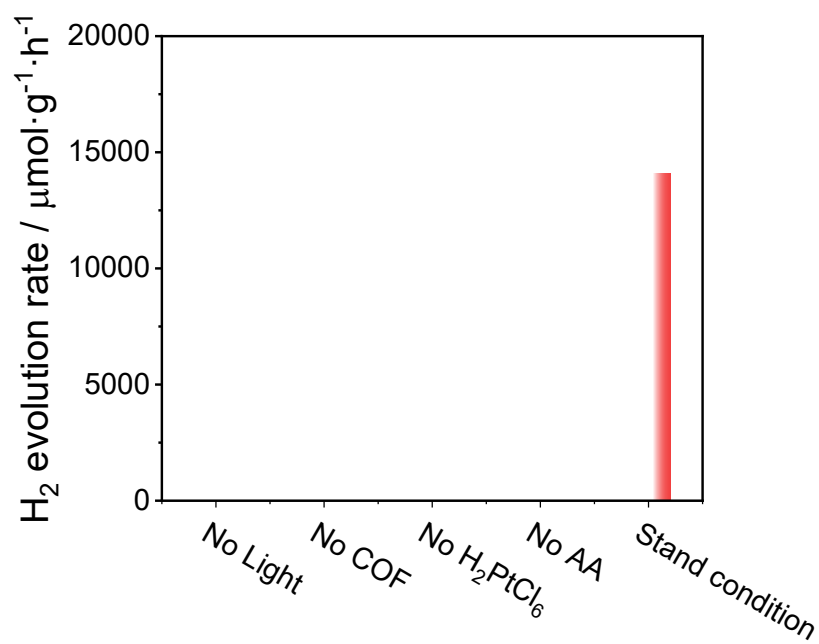

Figure S21. The control experiments of photocatalytic H<sub>2</sub> evolution using HIAM-0026 as the photocatalysts.

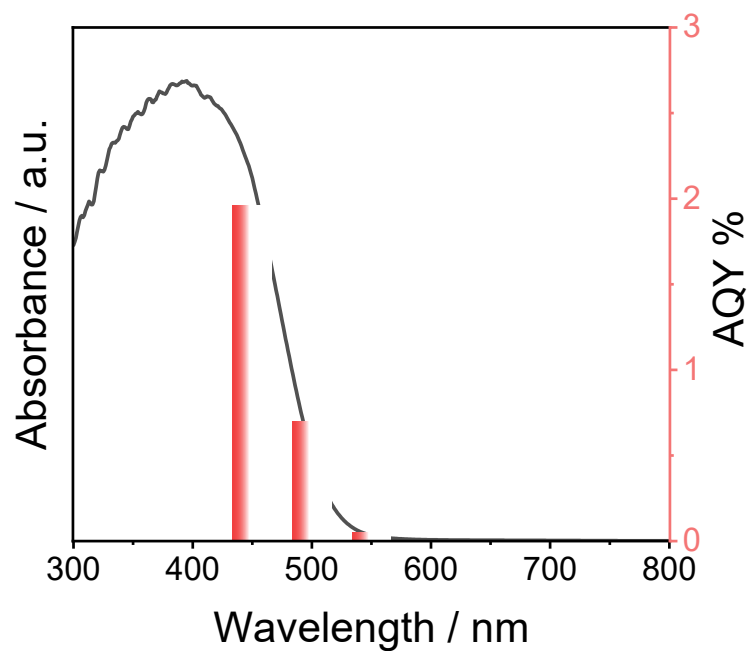

Figure S22. The wavelength-dependent AQY of photocatalytic H<sub>2</sub> evolution for HIAM-0026.

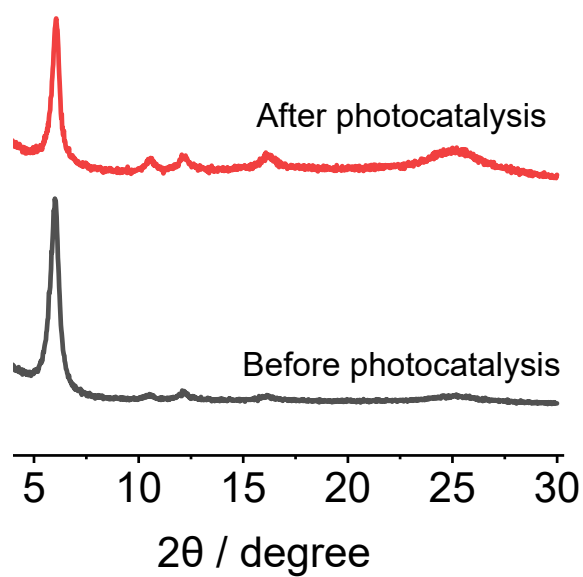

Figure S23. The PXRD patterns of HIAM-0026 before and after photocatalytic measurement.

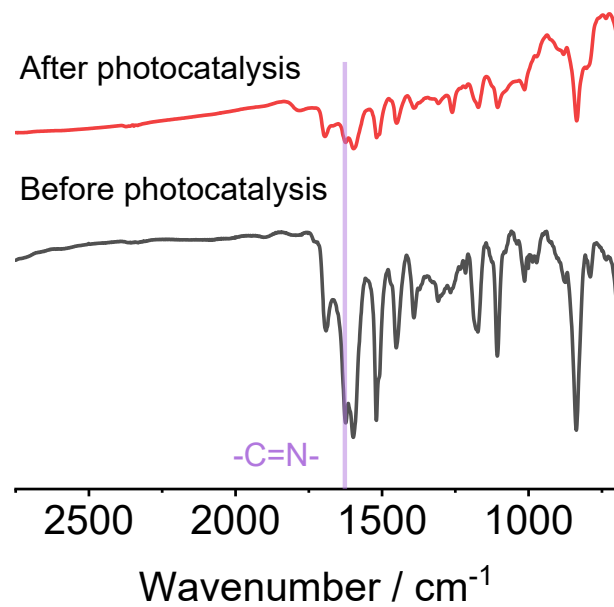

Figure S24. The FT-IR spectra of HIAM-0026 before and after photocatalytic measurement.

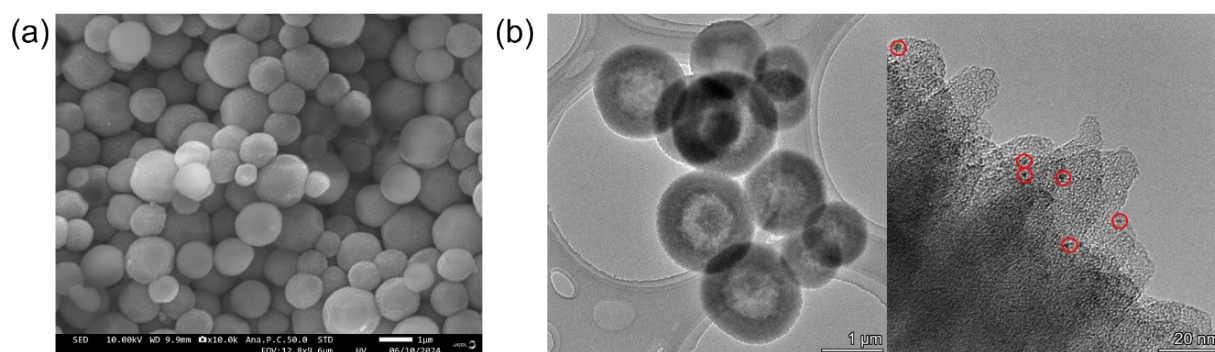

Figure S25. The SEM (a) and TEM (b) images of HIAM-0026 after photocatalytic measurement.

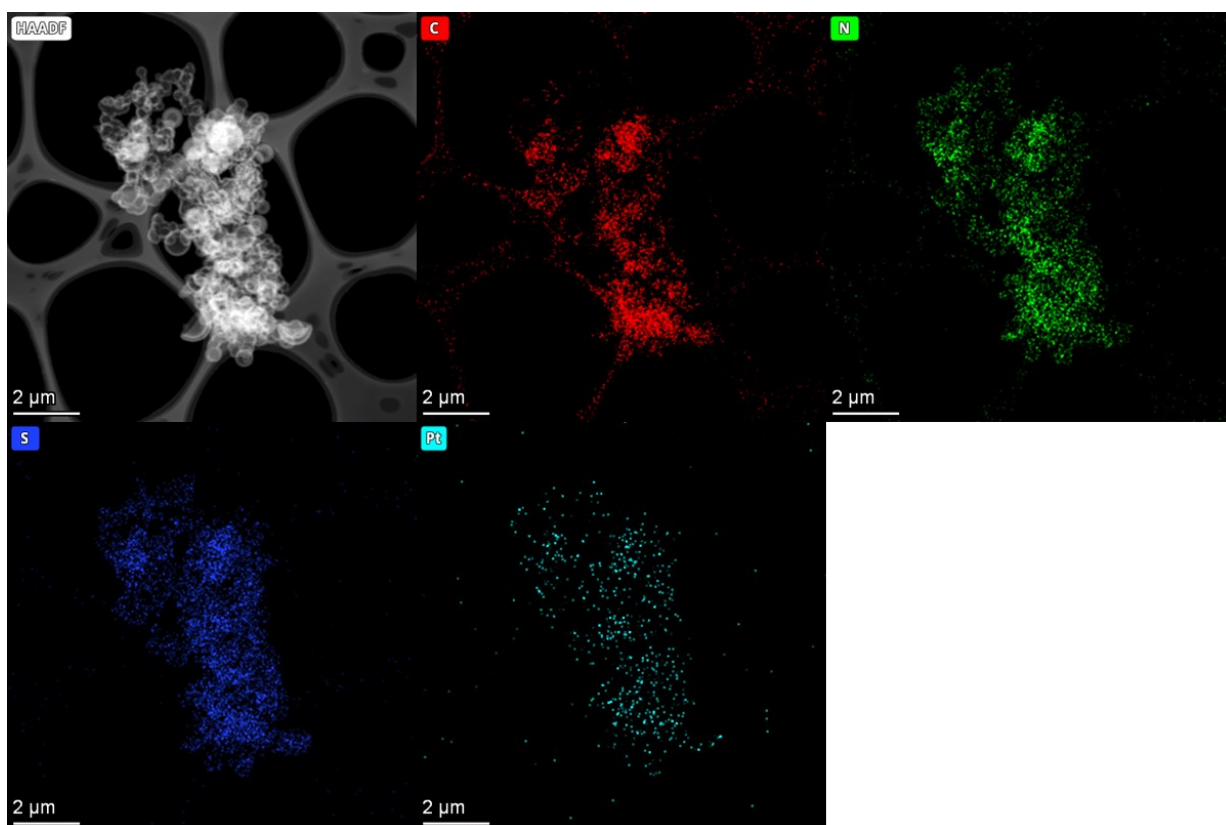

Figure S26. The HAADF-STEM and EDX analysis of HIAM-0026 after photocatalytic measurement.

Table S1. Atomic coordinates of AA-stacking mode of the simulated HIAM-0026.

| <b>Space group: <i>pm</i></b><br><b><math>a = 17.6928 \text{ \AA}</math>, <math>b = 3.3510 \text{ \AA}</math>, and <math>c = 16.6652 \text{ \AA}</math>.</b><br><b><math>\alpha = \gamma = 90^\circ</math>, and <math>\beta = 116.7130^\circ</math></b> |         |          |         |
|---------------------------------------------------------------------------------------------------------------------------------------------------------------------------------------------------------------------------------------------------------|---------|----------|---------|
| Atom                                                                                                                                                                                                                                                    | x       | y        | z       |
| <b>C1</b>                                                                                                                                                                                                                                               | 0.47148 | -0.00000 | 0.44363 |
| <b>C2</b>                                                                                                                                                                                                                                               | 0.43696 | -0.00000 | 0.34852 |
| <b>C3</b>                                                                                                                                                                                                                                               | 0.34776 | -0.00000 | 0.30183 |
| <b>C4</b>                                                                                                                                                                                                                                               | 0.29703 | -0.00000 | 0.34556 |
| <b>C5</b>                                                                                                                                                                                                                                               | 0.33078 | -0.00000 | 0.43999 |
| <b>C6</b>                                                                                                                                                                                                                                               | 0.42082 | -0.00000 | 0.48749 |
| <b>C7</b>                                                                                                                                                                                                                                               | 0.48899 | -0.00000 | 0.29655 |
| <b>C8</b>                                                                                                                                                                                                                                               | 0.27122 | -0.00000 | 0.48351 |
| <b>C9</b>                                                                                                                                                                                                                                               | 0.57903 | -0.00000 | 0.33931 |
| <b>C10</b>                                                                                                                                                                                                                                              | 0.62688 | -0.00000 | 0.29105 |
| <b>C11</b>                                                                                                                                                                                                                                              | 0.58272 | -0.00000 | 0.19825 |
| <b>C12</b>                                                                                                                                                                                                                                              | 0.4958  | -0.00000 | 0.15386 |
| <b>C13</b>                                                                                                                                                                                                                                              | 0.4486  | -0.00000 | 0.20134 |
| <b>C14</b>                                                                                                                                                                                                                                              | 0.18265 | -0.00000 | 0.43133 |
| <b>C15</b>                                                                                                                                                                                                                                              | 0.12868 | -0.00000 | 0.47138 |
| <b>C16</b>                                                                                                                                                                                                                                              | 0.16078 | -0.00000 | 0.56427 |
| <b>C17</b>                                                                                                                                                                                                                                              | 0.24723 | -0.00000 | 0.6195  |
| <b>C18</b>                                                                                                                                                                                                                                              | 0.30074 | -0.00000 | 0.57738 |
| <b>C19</b>                                                                                                                                                                                                                                              | 0.72195 | -0.00000 | 0.33505 |
| <b>C20</b>                                                                                                                                                                                                                                              | 0.28134 | -0.00000 | 0.72002 |
| <b>C21</b>                                                                                                                                                                                                                                              | 0.03771 | -0.00000 | 0.41597 |
| <b>C22</b>                                                                                                                                                                                                                                              | 0.45966 | -0.00000 | 0.05665 |
| <b>C23</b>                                                                                                                                                                                                                                              | 0.77066 | -0.00000 | 0.42948 |
| <b>C24</b>                                                                                                                                                                                                                                              | 0.85858 | -0.00000 | 0.46788 |
| <b>C25</b>                                                                                                                                                                                                                                              | 0.8998  | -0.00000 | 0.41373 |
| <b>C26</b>                                                                                                                                                                                                                                              | 0.85315 | -0.00000 | 0.32081 |
| <b>C27</b>                                                                                                                                                                                                                                              | 0.76642 | -0.00000 | 0.28233 |
| <b>C28</b>                                                                                                                                                                                                                                              | 0.22757 | -0.00000 | 0.76298 |
| <b>C29</b>                                                                                                                                                                                                                                              | 0.2597  | -0.00000 | 0.85625 |
| <b>C30</b>                                                                                                                                                                                                                                              | 0.34629 | -0.00000 | 0.91054 |
| <b>C31</b>                                                                                                                                                                                                                                              | 0.40269 | -0.00000 | 0.86625 |
| <b>C32</b>                                                                                                                                                                                                                                              | 0.36919 | -0.00000 | 0.77479 |
| <b>N33</b>                                                                                                                                                                                                                                              | 0.98935 | -0.00000 | 0.45598 |
| <b>N34</b>                                                                                                                                                                                                                                              | 0.37617 | -0.00000 | 1.00099 |
| <b>N35</b>                                                                                                                                                                                                                                              | 0.46596 | -0.00000 | 0.57738 |
| <b>S36</b>                                                                                                                                                                                                                                              | 0.57662 | -0.00000 | 0.61474 |

|            |         |          |         |
|------------|---------|----------|---------|
| <b>N37</b> | 0.55456 | -0.00000 | 0.50026 |
| <b>H38</b> | 0.31299 | -0.00000 | 0.23001 |
| <b>H39</b> | 0.2305  | -0.00000 | 0.30123 |
| <b>H40</b> | 0.61379 | -0.00000 | 0.40945 |
| <b>H41</b> | 0.61416 | -0.00000 | 0.15666 |
| <b>H42</b> | 0.38134 | -0.00000 | 0.16118 |
| <b>H43</b> | 0.15244 | -0.00000 | 0.35928 |
| <b>H44</b> | 0.11658 | -0.00000 | 0.59188 |
| <b>H45</b> | 0.3653  | -0.00000 | 0.61855 |
| <b>H46</b> | 0.01357 | -0.00000 | 0.34393 |
| <b>H47</b> | 0.50532 | -0.00000 | 1.03111 |
| <b>H48</b> | 0.74353 | -0.00000 | 0.47572 |
| <b>H49</b> | 0.89491 | -0.00000 | 0.54031 |
| <b>H50</b> | 0.88205 | -0.00000 | 0.27602 |
| <b>H51</b> | 0.73828 | -0.00000 | 0.21049 |
| <b>H52</b> | 0.15971 | -0.00000 | 0.72703 |
| <b>H53</b> | 0.21653 | -0.00000 | 0.88614 |
| <b>H54</b> | 0.47068 | -0.00000 | 0.9002  |
| <b>H55</b> | 0.4162  | -0.00000 | 0.75087 |

Table S2. Atomic coordinates of AA-stacking mode of the simulated HIAM-0026v.

| <b>Space group: <i>pm</i></b><br><b><i>a</i> = 16.7604 Å, <i>b</i> = 3.4336 Å, and <i>c</i> = 17.6106 Å.</b><br><b><math>\alpha = \gamma = 90^\circ</math>, and <math>\beta = 115.2181^\circ</math></b> |          |          |          |
|---------------------------------------------------------------------------------------------------------------------------------------------------------------------------------------------------------|----------|----------|----------|
| <b>Atom</b>                                                                                                                                                                                             | <b>x</b> | <b>y</b> | <b>z</b> |
| <b>C1</b>                                                                                                                                                                                               | 0.46804  | -0.00000 | 0.42068  |
| <b>C2</b>                                                                                                                                                                                               | 0.42437  | -0.00000 | 0.33134  |
| <b>C3</b>                                                                                                                                                                                               | 0.33152  | -0.00000 | 0.29732  |
| <b>C4</b>                                                                                                                                                                                               | 0.28575  | -0.00000 | 0.34732  |
| <b>C5</b>                                                                                                                                                                                               | 0.3287   | -0.00000 | 0.43611  |
| <b>C6</b>                                                                                                                                                                                               | 0.42237  | -0.00000 | 0.47062  |
| <b>C7</b>                                                                                                                                                                                               | 0.47066  | -0.00000 | 0.27299  |
| <b>C8</b>                                                                                                                                                                                               | 0.27482  | -0.00000 | 0.48786  |
| <b>C9</b>                                                                                                                                                                                               | 0.56377  | -0.00000 | 0.30419  |
| <b>C10</b>                                                                                                                                                                                              | 0.60799  | -0.00000 | 0.2523   |
| <b>C11</b>                                                                                                                                                                                              | 0.55634  | -0.00000 | 0.16636  |
| <b>C12</b>                                                                                                                                                                                              | 0.46434  | -0.00000 | 0.13093  |
| <b>C13</b>                                                                                                                                                                                              | 0.42215  | -0.00000 | 0.18417  |
| <b>C14</b>                                                                                                                                                                                              | 0.18218  | -0.00000 | 0.44851  |
| <b>C15</b>                                                                                                                                                                                              | 0.13164  | -0.00000 | 0.49457  |
| <b>C16</b>                                                                                                                                                                                              | 0.17248  | -0.00000 | 0.58135  |
| <b>C17</b>                                                                                                                                                                                              | 0.26438  | -0.00000 | 0.62473  |
| <b>C18</b>                                                                                                                                                                                              | 0.31341  | -0.00000 | 0.57639  |
| <b>C19</b>                                                                                                                                                                                              | 0.70752  | -0.00000 | 0.28649  |
| <b>C20</b>                                                                                                                                                                                              | 0.30927  | -0.00000 | 0.71939  |
| <b>N21</b>                                                                                                                                                                                              | 0.03758  | -0.00000 | 0.45588  |
| <b>N22</b>                                                                                                                                                                                              | 0.41254  | -0.00000 | 0.04103  |
| <b>C23</b>                                                                                                                                                                                              | 0.76222  | -0.00000 | 0.37388  |
| <b>C24</b>                                                                                                                                                                                              | 0.85354  | -0.00000 | 0.4043   |
| <b>C25</b>                                                                                                                                                                                              | 0.89309  | -0.00000 | 0.34867  |
| <b>C26</b>                                                                                                                                                                                              | 0.84124  | -0.00000 | 0.2629   |
| <b>C27</b>                                                                                                                                                                                              | 0.75044  | -0.00000 | 0.23206  |
| <b>C28</b>                                                                                                                                                                                              | 0.26101  | -0.00000 | 0.76905  |
| <b>C29</b>                                                                                                                                                                                              | 0.30408  | -0.00000 | 0.85673  |
| <b>C30</b>                                                                                                                                                                                              | 0.39596  | -0.00000 | 0.89647  |
| <b>C31</b>                                                                                                                                                                                              | 0.44413  | -0.00000 | 0.84871  |
| <b>C32</b>                                                                                                                                                                                              | 0.40226  | -0.00000 | 0.76244  |
| <b>C33</b>                                                                                                                                                                                              | 0.98822  | -0.00000 | 0.37813  |
| <b>C34</b>                                                                                                                                                                                              | 0.44676  | -0.00000 | 0.9871   |
| <b>N35</b>                                                                                                                                                                                              | 0.47597  | -0.00000 | 0.55311  |
| <b>S36</b>                                                                                                                                                                                              | 0.58926  | -0.00000 | 0.5755   |

|            |         |          |         |
|------------|---------|----------|---------|
| <b>N37</b> | 0.55594 | -0.00000 | 0.46584 |
| <b>H38</b> | 0.29036 | -0.00000 | 0.23104 |
| <b>H39</b> | 0.21548 | -0.00000 | 0.31211 |
| <b>H40</b> | 0.60388 | -0.00000 | 0.36855 |
| <b>H41</b> | 0.58846 | -0.00000 | 0.12685 |
| <b>H42</b> | 0.35139 | -0.00000 | 0.15318 |
| <b>H43</b> | 0.14806 | -0.00000 | 0.3822  |
| <b>H44</b> | 0.1298  | -0.00000 | 0.61285 |
| <b>H45</b> | 0.38168 | -0.00000 | 0.60876 |
| <b>H46</b> | 0.73758 | -0.00000 | 0.42111 |
| <b>H47</b> | 0.89305 | -0.00000 | 0.47154 |
| <b>H48</b> | 0.8711  | -0.00000 | 0.21908 |
| <b>H49</b> | 0.71777 | -0.00000 | 0.16482 |
| <b>H50</b> | 0.19014 | -0.00000 | 0.74246 |
| <b>H51</b> | 0.26576 | -0.00000 | 0.89309 |
| <b>H52</b> | 0.51565 | -0.00000 | 0.8783  |
| <b>H53</b> | 0.44663 | -0.00000 | 0.73301 |
| <b>H54</b> | 0.01284 | -0.00000 | 0.32966 |
| <b>H55</b> | 0.51642 | -0.00000 | 1.00573 |



Table S3. The summary of benzothiadiazole-based COFs for photocatalytic hydrogen generation performance.

| COFs           | illumination          | sacrificial agent | co-catalyst | AQY (%)       | H <sub>2</sub> Evolution Rate (mmol·g <sup>-1</sup> ·h <sup>-1</sup> ) | Ref       |
|----------------|-----------------------|-------------------|-------------|---------------|------------------------------------------------------------------------|-----------|
| CTF-BT/Th-1    | $\lambda \geq 420$ nm | TEOA              | 3 wt% Pt    | 7.3 (420 nm)  | 6.6                                                                    | 1         |
| BT-TAPT-COF    | $\lambda \geq 420$ nm | AA                | 8 wt% Pt    | 0.19 (410 nm) | 0.949                                                                  | 2         |
| Py-CITP-BT-COF | $\lambda > 420$ nm    | AA                | 5 wt% Pt    | 8.45 (420 nm) | 8.875                                                                  | 3         |
| Py-FTP-BT-COF  | $\lambda > 420$ nm    | AA                | 5 wt% Pt    | --            | 2.875                                                                  |           |
| Py-HTP-BT-COF  | $\lambda > 420$ nm    | AA                | 5 wt% Pt    | --            | 1.078                                                                  |           |
| COF-F          | AM 1.5                | AA                | 3 wt% Pt    | 0.29 (500 nm) | 10.581                                                                 | 4         |
| COF-CI         | AM 1.5                | AA                | 3 wt% Pt    | --            | 5.838                                                                  |           |
| COF-H          | AM 1.5                | AA                | 3 wt% Pt    | --            | 5.034                                                                  |           |
| BT-COF150      | $\lambda \geq 400$ nm | TEOA              | 1 wt% Pt    | 0.4 (420 nm)  | 0.75                                                                   | 5         |
| NKCOF-108      | $\lambda > 420$ nm    | AA                | 5 wt% Pt    | 5.92 (520 nm) | 11.6                                                                   | 6         |
| 30%PEG@BT-COF  | $\lambda > 420$ nm    | AA                | 3.7 wt% Pt  | 11.2 (520 nm) | 11.14                                                                  | 7         |
| USTB-7         | $\lambda \geq 420$ nm | AA                | 3 wt% Pt    | --            | 4.3                                                                    | 8         |
| USTB-8         | $\lambda \geq 420$ nm | AA                | 3 wt% Pt    | --            | 13.7                                                                   |           |
| TeTz-COF1      | $\lambda > 420$ nm    | AA                | 4 wt% Pt    | 3.5 (475 nm)  | 2.103                                                                  | 9         |
| HPT-COF        | $\lambda \geq 420$ nm | AA                | 3 wt% Pt    | --            | 3.8                                                                    | 10        |
| BT-COF         | $\lambda \geq 420$ nm | AA                | 3 wt% Pt    | --            | 0.68                                                                   |           |
| HIAM-0001      | $\lambda > 420$ nm    | AA                | 5 wt% Pt    | --            | 1.41                                                                   | 11        |
|                |                       | TEOA              | 12 wt% Pt   | --            | 1.217                                                                  |           |
| Py-N-DBT-COF   | $\lambda > 420$ nm    | AA                | 5 wt% Pt    | --            | 0.82                                                                   | 12        |
| Py-C-DBT-COF   | $\lambda > 420$ nm    | AA                | 5 wt% Pt    | 8.65 (450 nm) | 21.37                                                                  |           |
| HIAM-0011      | $\lambda > 420$ nm    | AA                | 1 wt% Pt    | 9 (450 nm)    | 16.98                                                                  | 13        |
| HIAM-0026      | $\lambda > 420$ nm    | AA                | 3 wt% Pt    | 1.96 (450 nm) | 14.09                                                                  | This work |

## References

- [1] W. Huang, Q. He, Y. Hu, Y. Li, *Angewandte Chemie International Edition* **2019**, *58*, 8676-8680.
- [2] G.-B. Wang, S. Li, C.-X. Yan, Q.-Q. Lin, F.-C. Zhu, Y. Geng, Y.-B. Dong, *Chemical Communications* **2020**, *56*, 12612-12615.
- [3] W. Chen, L. Wang, D. Mo, F. He, Z. Wen, X. Wu, H. Xu, L. Chen, *Angewandte Chemie International Edition* **2020**, *59*, 16902-16909.
- [4] M. Wang, Z. Wang, M. Shan, J. Wang, Z. Qiu, J. Song, Z. Li, *Chemistry of Materials* **2023**, *35*, 5368-5377.
- [5] S. Ghosh, A. Nakada, M. A. Springer, T. Kawaguchi, K. Suzuki, H. Kaji, I. Baburin, A. Kuc, T. Heine, H. Suzuki, R. Abe, S. Seki, *Journal of the American Chemical Society* **2020**, *142*, 9752-9762.
- [6] Z. Zhao, Y. Zheng, C. Wang, S. Zhang, J. Song, Y. Li, S. Ma, P. Cheng, Z. Zhang, Y. Chen, *ACS Catalysis* **2021**, *11*, 2098-2107.
- [7] T. Zhou, L. Wang, X. Huang, J. Unruangsri, H. Zhang, R. Wang, Q. Song, Q. Yang, W. Li, C. Wang, K. Takahashi, H. Xu, J. Guo, *Nature Communications* **2021**, *12*, 3934.
- [8] W. Li, X. Ding, B. Yu, H. Wang, Z. Gao, X. Wang, X. Liu, K. Wang, J. Jiang, *Advanced Functional Materials* **2022**, *32*, 2207394.
- [9] L. Hao, K. Huang, N. Wang, R. Shen, S. Chen, W. Bi, N. Li, P. Zhang, Y. Li, X. Li, *Dalton Transactions* **2022**, *51*, 14952-14959.
- [10] C. Lin, X. Liu, B. Yu, C. Han, L. Gong, C. Wang, Y. Gao, Y. Bian, J. Jiang, *ACS Applied Materials & Interfaces* **2021**, *13*, 27041-27048.

- [11] C.-Q. Han, X. Sun, X. Liang, L. Wang, H. Hu, X.-Y. Liu, *Journal of Materials Chemistry C* **2023**, *11*, 12000-12006.
- [12] X. Ren, J. Sun, Y. Li and F. Bai, *Nano Research*, **2024**, *17*, 4994-5001.
- [13] J.-X. Guo, Z.-Y. Wang, C.-Q. Han, S. Sun, L. Wang, G. Lu, X.-Y. Liu, *Journal of Materials Chemistry C*, **2024**, *12*, 7741-7747.
